# Supplementary material for: Novel Molecular Subtyping Scheme Based on In Silico Analysis of Cuproptosis Regulator Gene Patterns Optimizes Survival Prediction and Treatment of Hepatocellular Carcinoma
Source: J Clin Med. 2023 Sep 5;12(18):5767. doi: 10.3390/jcm12185767 (PMC10531788; doi:10.3390/jcm12185767)
Supplement: Supplementary file 1 [file jcm-12-05767-s001.zip › jcm-2231573 Supplementary Table.xls]

## Sheet: Supplementary Table S1
Supplementary Table S1: The senescent-associated secretory phenotype or the senescence messaging secretome secreted by Senescent cells.
SASP factors	Genes or pathways involved in regulation of SASP
Interleukins (IL)
IL-6	IL-6
IL-7	IL-7
IL-1a, -1b	IL1A, IL1B
IL-13	IL13
IL-15	IL15
Chemokines (CXCL, CCL)
IL-8	CXCL8
GRO-a,-b,-gc	CXCL1,CXCL2
MCP-2	CCL8
MCP-4	CCL13
MIP-1a	CCL3
MIP-3a	CCL20
HCC-4	CCL16
Eotaxin	CCL11
Eotaxin-3	CCL26
TECK	CCL25
ENA-78	CXCL5
I-309	CCL1
I-TAC	CXCL11
Other inflammatory factors
GM-CSE	/
G-CSE	/
IFN-γ	/
BLC	CXCL13
MIF	MIF
Growth factors and regulators
Amphiregulin	AREG
Epiregulin	EREG
Heregulin	/
EGF	EGF
bFGF	FGF2
HGF	HGF
KGF (FGF7)	FGF7
VEGF	VEGFA
Angiogenin	ANG
SCF	KITLG
SDF-1	CXCL12
PIGF	PIGF
NGF	NGF
IGFBP-2, -3, -4, -6, -7	IGFBP2,IGFBP3,IGFBP4,IGFBP5,IGFBP6,IGFBP7
Proteases and regulators
MMP-1, -3, -10, -12, -13, -14	MMP1,MMP3,MMP10,MMP12,MMP13,MMP14
TIMP-1	TIMP1
TIMP-2	TIMP2
PAI-1, -2; tPA; uPA	SERPINE1,SERPINB2
Cathepsin B	CTSB
Soluble or shed receptors or ligands
ICAM-1, -3	ICAM1,ICAM3
OPG	TNFRSF11B
sTNFRI	TNFRSF1A
TRAIL-R3, Fas, sTNFRII	TNFRSF10C,TNFRSF1B
Fas	FAS
uPAR	PLAUR
SGP130	/
EGF-R	EGFR
Nonprotein soluble factors
PGE2	PTGER2
Nitric oxide	BIOCARTA_Nitric Oxide Signaling Pathway
Reactive oxygen species	GObp_response to reactive oxygen species (GO:0000302)
Insoluble factors (ECM) and Collagens	NABA_core matrisome
Fibronectin	FN1,Reactome fibronectin matrix formation ( R-HSA-1566977)
Laminin	Reactome_laminin interactions (R-HSA-3000157)

## Sheet: Supplementary Table S2
Supplementary Table S2: Gene set membership of 22 biological processes obtained from previous studies and the KEGG database.
name	Source
Angiogenesis	PMID: 22553347	CDH5	SOX17	SOX18	TEK
Antigen processing and presentation	PMID: 27855702	IFNG	TNF	PSME1	PSME2	PSME3	HSPA8	HSPA1A	HSPA2	HSPA1L	HSPA1B	HSPA6	HSPA4	HSP90AA1	HSP90AB1	HLA-A	HLA-B	HLA-C	HLA-F	HLA-G	HLA-E	HSPA5	CANX	B2M	PDIA3	CALR	TAPBP	TAP1	TAP2	CD8A	CD8B	CD8B2	KIR3DL2	KIR3DL1	KIR3DL3	KIR2DL2	KIR2DL1	KIR2DL3	KIR2DL4	KIR2DL5A	KLRC1	KLRC2	KLRC3	KLRC4	KLRD1	KIR2DS1	KIR2DS3	KIR2DS4	KIR2DS5
Antigen processing machinery	PMID: 27855702	B2M	HLA-A	HLA-B	HLA-C	TAP1	TAP2
Base excision repair	KEGG hsa03410	OGG1	NTHL1	NEIL1	NEIL2	NEIL3	UNG	SMUG1	MUTYH	MPG	MBD4	TDG	APEX1	APEX2	POLB	POLL	HMGB1	XRCC1	PCNA	POLD1	POLD2	POLD3	POLD4	POLE	POLE2	POLE3	POLE4	LIG1	LIG3	PARP1	PARP2	PARP3	PARP4	FEN1
CD8 T effector	PMID: 26952546	CD8A	CXCL10	CXCL9	GZMA	GZMB	IFNG	PRF1	TBX21
Cell cycle	KEGG hsa4110	ABL1	ANAPC1	ANAPC10	ANAPC11	ANAPC13	ANAPC2	ANAPC4	ANAPC5	ANAPC7	ATM	ATR	BUB1	BUB1B	BUB3	CCNA1	CCNA2	CCNB1	CCNB2	CCNB3	CCND1	CCND2	CCND3	CCNE1	CCNE2	CCNH	CDC14A	CDC14B	CDC16	CDC20	CDC23	CDC25A	CDC25B	CDC25C	CDC26	CDC27	CDC45	CDC6	CDC7	CDK1	CDK2	CDK4	CDK6	CDK7	CDKN1A	CDKN1B	CDKN1C	CDKN2A	CDKN2B
DNA damage repair	Wood lab	ALKBH2	ALKBH3	APEX1	APEX2	APLF	ATM	ATR	ATRIP	BLM	BRCA1	BRCA2	BRIP1	CCNH	CDK7	CETN2	CHAF1A	CHEK1	CHEK2	CLK2	DCLRE1C	DDB1	DDB2	DUT	ENDOV	ERCC1	ERCC2	ERCC3	ERCC4	ERCC5	ERCC6	ERCC8	FAN1	FANCA	FANCB	FANCC	FANCD2	FANCE	FANCF	FANCG	FANCL	FANCM	GTF2H1	GTF2H2	GTF2H3	GTF2H4	GTF2H5	H2AFX	HLTF
DNA replication	KEGG hsa3030	DNA2	FEN1	LIG1	MCM2	MCM3	MCM4	MCM5	MCM6	MCM7	PCNA	POLA1	POLA2	POLD1	POLD2	POLD3	POLD4	POLE	POLE2	POLE3	POLE4	PRIM1	PRIM2	RFC1	RFC2	RFC3	RFC4	RFC5	RNASEH1	RNASEH2A	RNASEH2B	RNASEH2C	RPA1	RPA2	RPA3	RPA4	SSBP1
ECM-receptor interaction	KEGG hsa04512	COL1A1	COL1A2	COL2A1	COL4A2	COL4A4	COL4A6	COL4A1	COL4A5	COL4A3	COL6A1	COL6A2	COL6A3	COL6A6	COL6A5	COL9A1	COL9A2	COL9A3	LAMA1	LAMA2	LAMA3	LAMA5	LAMA4	LAMB1	LAMB2	LAMB3	LAMB4	LAMC1	LAMC2	LAMC3	CHAD	RELN	THBS1	COMP	THBS2	THBS3	THBS4	FN1	SPP1	VTN	TNC	TNN	TNR	TNXB	NPNT	FRAS1	FREM2	FREM1	DSPP
EMT1	PMID: 24520177	CLDN3	CLDN7	CLDN4	CDH1	VIM	TWIST1	ZEB1	ZEB2
EMT2	PMID: 26997480	AXL	FAP	LOXL2	ROR2	TAGLN	TWIST2	WNT5A
EMT3	PMID: 27321955	FOXF1	GATA6	SOX9	TWIST1	ZEB1	ZEB2
Immune checkpoint	PMID: 29443960	CD274	CTLA4	HAVCR2	LAG3	PDCD1	PDCD1LG2	TIGIT
JAK-STAT signaling pathway	KEGG hsa04630	AKT1	AKT2	AKT3	BCL2L1	CBL	CBLB	CBLC	CCND1	CCND2	CCND3	CISH	CLCF1	CNTF	CNTFR	CREBBP	CRLF2	CSF2	CSF2RA	CSF2RB	CSF3	CSF3R	CSH1	CTF1	EP300	EPO	EPOR	GH1	GH2	GHR	GRB2	IFNA1	IFNA10	IFNA13	IFNA14	IFNA16	IFNA17	IFNA2	IFNA21	IFNA4	IFNA5	IFNA6	IFNA7	IFNA8	IFNAR1	IFNAR2	IFNB1	IFNE	IFNG
MAPK signaling pathway	KEGG hsa04010	AKT1	AKT2	AKT3	ARRB1	ARRB2	ATF2	ATF4	BDNF	BRAF	CACNA1A	CACNA1B	CACNA1C	CACNA1D	CACNA1E	CACNA1F	CACNA1G	CACNA1H	CACNA1I	CACNA1S	CACNA2D1	CACNA2D2	CACNA2D3	CACNA2D4	CACNB1	CACNB2	CACNB3	CACNB4	CACNG1	CACNG2	CACNG3	CACNG4	CACNG5	CACNG6	CACNG7	CACNG8	CASP3	CD14	CDC25B	CDC42	CHP1	CHP2	CHUK	CRK	CRKL	DAXX	DDIT3	DUSP1	DUSP10
Mismatch repair	KEGG hsa3430	EXO1	LIG1	MLH1	MLH3	MSH2	MSH3	MSH6	PCNA	PMS2	POLD1	POLD2	POLD3	POLD4	RFC1	RFC2	RFC3	RFC4	RFC5	RPA1	RPA2	RPA3	RPA4	SSBP1
NF-kappa B signaling pathway	KEGG hsa04064	LCK	ZAP70	LAT	PLCG1	PRKCQ	IGH	SYK	LYN	BLNK	BTK	PLCG2	PRKCB	CARD10	CARD11	CARD14	BCL10	MALT1	IL1B	IL1R1	MYD88	IRAK1	IRAK4	TRAF6	TNF	TNFRSF1A	RIPK1	TRADD	TRAF2	TRAF5	BIRC2	BIRC3	EDA	EDAR	EDARADD	CYLD	EDA2R	DDX58	TRIM25	LBP	CD14	TLR4	LY96	TIRAP	TICAM2	TICAM1	CD40LG	CD40	TRAF3
Nucleotide excision repair	KEGG hsa3420	CCNH	CDK7	CETN2	CUL4A	CUL4B	DDB1	DDB2	ERCC1	ERCC2	ERCC3	ERCC4	ERCC5	ERCC6	ERCC8	GTF2H1	GTF2H2	GTF2H3	GTF2H4	GTF2H5	LIG1	MNAT1	PCNA	POLD1	POLD2	POLD3	POLD4	POLE	POLE2	POLE3	POLE4	RAD23A	RAD23B	RBX1	RFC1	RFC2	RFC3	RFC4	RFC5	RPA1	RPA2	RPA3	RPA4	XPA	XPC
Pan-F-TBRS	PMID: 29443960	ACTA2	ACTG2	ADAM12	ADAM19	CNN1	COL4A1	CTGF	CTPS1	FAM101B	FSTL3	HSPB1	IGFBP3	PXDC1	SEMA7A	SH3PXD2A	TAGLN	TGFBI	TNS1	TPM1
PI3K-Akt signaling pathway	KEGG hsa04151	EGF	TGFA	EREG	AREG	FGF1	FGF2	FGF3	FGF4	FGF17	FGF6	FGF7	FGF8	FGF9	FGF10	FGF16	FGF5	FGF18	FGF20	FGF22	FGF19	FGF21	FGF23	NGF	BDNF	NTF3	NTF4	INS	IGF1	IGF2	PDGFA	PDGFB	PDGFC	PDGFD	CSF1	KITLG	FLT3LG	VEGFA	VEGFB	PGF	VEGFC	VEGFD	HGF	ANGPT1	ANGPT2	ANGPT4	EFNA1	EFNA2	EFNA3
TGF-beta signaling pathway	KEGG hsa04350	AC023512.1	ACVR1	ACVR1C	ACVR2A	ACVR2B	ACVRL1	AMH	AMHR2	BMP2	BMP4	BMP5	BMP6	BMP7	BMP8A	BMP8B	BMPR1A	BMPR1B	BMPR2	CDKN2B	CHRD	COMP	CREBBP	CUL1	DCN	E2F4	E2F5	EP300	FST	GDF5	GDF6	GDF7	ID1	ID2	ID3	ID4	IFNG	INHBA	INHBB	INHBC	INHBE	LEFTY1	LEFTY2	LTBP1	MAPK1	MAPK3	MYC	NODAL	NOG
Wnt signaling pathway	KEGG hsa04310	AC023512.1	APC	APC2	AXIN1	AXIN2	BTRC	CACYBP	CAMK2A	CAMK2B	CAMK2D	CAMK2G	CCND1	CCND2	CCND3	CER1	CHD8	CHP1	CHP2	CREBBP	CSNK1A1	CSNK1A1L	CSNK1E	CSNK2A1	CSNK2A2	CSNK2B	CTBP1	CTBP2	CTNNB1	CTNNBIP1	CUL1	CXXC4	DAAM1	DAAM2	DKK1	DKK2	DKK4	DVL1	DVL2	DVL3	EP300	FBXW11	FOSL1	FRAT1	FRAT2	FZD1	FZD10	FZD2	FZD3
[truncated: 306 more columns]

## Sheet: Supplementary Table S3
Supplementary Table S3：The HRD and LOH scores of each patients in TCGA-LIHC cohort obtained from the study of Vésteinn et al.(doi:10.1016/j.immuni.2018.03.023)
ID	Cu cluster	LOH	HRD
TCGA-2Y-A9GU-01	A	3	17
TCGA-2Y-A9GX-01	A	5	18
TCGA-2Y-A9H5-01	A	9	25
TCGA-2Y-A9H6-01	A	7	18
TCGA-5C-A9VG-01	A	3	13
TCGA-5C-A9VH-01	A	5	12
TCGA-5R-AA1D-01	A	0	1
TCGA-BC-4073-01	A	2	12
TCGA-BC-A10R-01	A	7	26
TCGA-BC-A10X-01	A	0	0
TCGA-CC-A5UC-01	A	5	19
TCGA-CC-A7IL-01	A	6	19
TCGA-CC-A9FV-01	A	0	0
TCGA-DD-A116-01	A	3	16
TCGA-DD-A118-01	A	4	19
TCGA-DD-A119-01	A	4	17
TCGA-DD-A11B-01	A	2	7
TCGA-DD-A1ED-01	A	0	0
TCGA-DD-A1EH-01	A	3	9
TCGA-DD-A39W-01	A	0	7
TCGA-DD-A39X-01	A	4	16
TCGA-DD-A3A2-01	A	0	1
TCGA-DD-A3A4-01	A	2	8
TCGA-DD-A4NA-01	A	9	24
TCGA-DD-A4NB-01	A	0	0
TCGA-DD-A4ND-01	A	5	14
TCGA-DD-A4NK-01	A	2	8
TCGA-DD-A4NL-01	A	0	0
TCGA-DD-A4NN-01	A	12	34
TCGA-DD-A4NO-01	A	2	11
TCGA-DD-A4NP-01	A	0	0
TCGA-DD-A4NS-01	A	1	8
TCGA-DD-A73C-01	A	1	2
TCGA-DD-AA3A-01	A	6	17
TCGA-DD-AACA-01	A	5	19
TCGA-DD-AACC-01	A	8	28
TCGA-DD-AACN-01	A	7	20
TCGA-DD-AACS-01	A	9	33
TCGA-DD-AACW-01	A	4	15
TCGA-DD-AAD1-01	A	5	20
TCGA-DD-AAD2-01	A	1	8
TCGA-DD-AAD3-01	A	7	21
TCGA-DD-AADA-01	A	4	18
TCGA-DD-AADI-01	A	6	13
TCGA-DD-AADJ-01	A	5	14
TCGA-DD-AADK-01	A	6	17
TCGA-DD-AADY-01	A	12	30
TCGA-DD-AAE0-01	A	7	21
TCGA-DD-AAEE-01	A	10	32
TCGA-DD-AAVQ-01	A	7	18
TCGA-DD-AAVR-01	A	2	13
TCGA-DD-AAVS-01	A	6	20
TCGA-DD-AAVV-01	A	5	29
TCGA-DD-AAVW-01	A	8	29
TCGA-DD-AAVZ-01	A	7	17
TCGA-DD-AAW0-01	A	7	23
TCGA-ED-A4XI-01	A	2	12
TCGA-ED-A5KG-01	A	0	0
TCGA-ED-A627-01	A	0	0
TCGA-ED-A66X-01	A	0	12
TCGA-ED-A7PY-01	A	6	18
TCGA-ED-A8O5-01	A	7	14
TCGA-ED-A8O6-01	A	7	23
TCGA-ED-A97K-01	A	16	46
TCGA-EP-A2KB-01	A	1	5
TCGA-EP-A3JL-01	A	1	6
TCGA-ES-A2HT-01	A	1	3
TCGA-FV-A2QR-01	A	7	27
TCGA-FV-A3I0-01	A	10	30
TCGA-FV-A3I1-01	A	4	15
TCGA-FV-A3R2-01	A	4	12
TCGA-FV-A3R3-01	A	1	7
TCGA-G3-A3CG-01	A	3	8
TCGA-G3-A3CI-01	A	1	2
TCGA-G3-A5SL-01	A	2	7
TCGA-G3-A7M7-01	A	1	3
TCGA-G3-A7M8-01	A	0	0
TCGA-G3-AAV1-01	A	5	27
TCGA-G3-AAV6-01	A	3	29
TCGA-HP-A5MZ-01	A	0	2
TCGA-HP-A5N0-01	A	5	19
TCGA-K7-A6G5-01	A	1	5
TCGA-MI-A75I-01	A	7	13
TCGA-MR-A520-01	A	0	0
TCGA-RC-A6M5-01	A	0	7
TCGA-T1-A6J8-01	A	9	19
TCGA-UB-A7ME-01	A	6	36
TCGA-UB-A7MF-01	A	5	29
TCGA-UB-AA0V-01	A	0	0
TCGA-WX-AA46-01	A	1	5
TCGA-ZP-A9CV-01	A	2	5
TCGA-ZP-A9D0-01	A	6	23
TCGA-2V-A95S-01	B	3	14
TCGA-2Y-A9GS-01	B	5	9
TCGA-2Y-A9GW-01	B	1	12
TCGA-2Y-A9GY-01	B	6	24
TCGA-2Y-A9H0-01	B	5	16
TCGA-2Y-A9H2-01	B	8	34
TCGA-2Y-A9HA-01	B	8	21
TCGA-2Y-A9HB-01	B	2	6
TCGA-BC-A10Q-01	B	5	15
TCGA-BC-A10S-01	B	3	7
TCGA-BC-A10T-01	B	9	33
TCGA-BC-A10U-01	B	4	13
TCGA-BC-A10W-01	B	7	24
TCGA-BC-A10Y-01	B	7	29
TCGA-BC-A10Z-01	B	6	19
TCGA-BC-A112-01	B	3	18
TCGA-BC-A216-01	B	6	20
TCGA-BC-A217-01	B	4	34
TCGA-BC-A3KF-01	B	10	34
TCGA-BC-A3KG-01	B	8	24
TCGA-BC-A5W4-01	B	11	30
TCGA-BC-A8YO-01	B	8	19
TCGA-BD-A2L6-01	B	4	13
TCGA-BD-A3EP-01	B	6	18
TCGA-BD-A3ER-01	B	1	6
TCGA-BW-A5NQ-01	B	1	3
TCGA-CC-5258-01	B	3	26
TCGA-CC-5260-01	B	6	17
TCGA-CC-5261-01	B	6	28
TCGA-CC-5262-01	B	3	14
TCGA-CC-5263-01	B	12	34
TCGA-CC-5264-01	B	9	26
TCGA-CC-A1HT-01	B	7	26
TCGA-CC-A3M9-01	B	12	37
TCGA-CC-A3MA-01	B	12	35
TCGA-CC-A3MB-01	B	3	27
TCGA-CC-A3MC-01	B	5	25
TCGA-CC-A5UD-01	B	6	23
TCGA-CC-A5UE-01	B	6	34
TCGA-CC-A7IG-01	B	15	63
TCGA-CC-A7II-01	B	2	25
TCGA-CC-A7IJ-01	B	5	31
TCGA-CC-A7IK-01	B	3	14
TCGA-CC-A8HT-01	B	6	13
TCGA-CC-A8HU-01	B	11	34
TCGA-CC-A8HV-01	B	13	39
TCGA-CC-A9FU-01	B	14	31
TCGA-CC-A9FW-01	B	6	21
TCGA-DD-A113-01	B	10	31
TCGA-DD-A114-01	B	4	11
TCGA-DD-A11A-01	B	3	46
TCGA-DD-A11C-01	B	8	40
TCGA-DD-A1EC-01	B	3	11
TCGA-DD-A1EE-01	B	2	7
TCGA-DD-A1EG-01	B	3	14
TCGA-DD-A1EI-01	B	5	18
TCGA-DD-A1EJ-01	B	3	16
TCGA-DD-A1EK-01	B	6	15
TCGA-DD-A1EL-01	B	9	33
TCGA-DD-A39Y-01	B	6	18
TCGA-DD-A3A1-01	B	3	14
TCGA-DD-A3A6-01	B	0	0
TCGA-DD-A4NH-01	B	11	23
TCGA-DD-A4NI-01	B	1	8
TCGA-DD-A4NQ-01	B	5	14
TCGA-DD-A4NR-01	B	4	14
TCGA-DD-A4NV-01	B	4	8
TCGA-DD-A73F-01	B	6	20
TCGA-DD-AACH-01	B	14	52
TCGA-DD-AACJ-01	B	3	8
TCGA-DD-AACK-01	B	1	6
TCGA-DD-AACQ-01	B	7	26
TCGA-DD-AACU-01	B	5	21
TCGA-DD-AACX-01	B	4	12
TCGA-DD-AACZ-01	B	8	29
TCGA-DD-AAD5-01	B	5	34
TCGA-DD-AADB-01	B	7	17
TCGA-DD-AADD-01	B	3	16
TCGA-DD-AADL-01	B	9	19
TCGA-DD-AADV-01	B	8	23
TCGA-DD-AADW-01	B	9	37
TCGA-DD-AAED-01	B	10	20
TCGA-DD-AAEG-01	B	3	18
TCGA-ED-A459-01	B	10	42
TCGA-ED-A66Y-01	B	5	15
TCGA-ED-A7PX-01	B	13	36
TCGA-ED-A7XP-01	B	5	27
TCGA-ED-A82E-01	B	8	29
TCGA-EP-A26S-01	B	1	5
TCGA-EP-A2KA-01	B	3	14
TCGA-EP-A2KC-01	B	2	5
TCGA-EP-A3RK-01	B	4	17
TCGA-FV-A23B-01	B	4	19
TCGA-FV-A2QQ-01	B	4	12
TCGA-FV-A496-01	B	5	43
TCGA-FV-A4ZQ-01	B	4	15
TCGA-G3-A25T-01	B	4	13
TCGA-G3-A25U-01	B	7	19
TCGA-G3-A25Y-01	B	7	32
TCGA-G3-A25Z-01	B	4	12
TCGA-G3-A3CH-01	B	4	12
TCGA-G3-A5SJ-01	B	4	12
TCGA-G3-A5SM-01	B	3	9
TCGA-G3-A7M6-01	B	6	21
TCGA-G3-A7M9-01	B	10	31
TCGA-G3-AAV5-01	B	2	7
TCGA-G3-AAV7-01	B	10	23
TCGA-GJ-A3OU-01	B	8	15
TCGA-GJ-A6C0-01	B	4	23
TCGA-K7-A5RG-01	B	0	6
TCGA-K7-AAU7-01	B	3	11
TCGA-KR-A7K0-01	B	1	4
TCGA-LG-A6GG-01	B	6	16
TCGA-MI-A75E-01	B	0	6
TCGA-MI-A75G-01	B	4	10
TCGA-MR-A8JO-01	B	3	11
TCGA-NI-A4U2-01	B	5	17
TCGA-O8-A75V-01	B	4	18
TCGA-PD-A5DF-01	B	6	28
TCGA-QA-A7B7-01	B	8	23
TCGA-RC-A6M3-01	B	4	24
TCGA-RC-A6M6-01	B	10	42
TCGA-RC-A7S9-01	B	4	19
TCGA-RC-A7SB-01	B	9	19
TCGA-RC-A7SK-01	B	2	20
TCGA-UB-A7MA-01	B	9	42
TCGA-UB-A7MB-01	B	8	29
TCGA-UB-A7MC-01	B	5	20
TCGA-UB-A7MD-01	B	3	9
TCGA-UB-AA0U-01	B	12	41
TCGA-WJ-A86L-01	B	4	23
TCGA-WX-AA44-01	B	3	15
TCGA-XR-A8TD-01	B	9	29
TCGA-XR-A8TE-01	B	0	4
TCGA-XR-A8TG-01	B	5	20
TCGA-YA-A8S7-01	B	3	19
TCGA-ZP-A9CZ-01	B	6	30
TCGA-ZP-A9D1-01	B	2	14
TCGA-ZP-A9D2-01	B	4	12
TCGA-2Y-A9GT-01	C	1	2
TCGA-2Y-A9GV-01	C	7	19
TCGA-2Y-A9GZ-01	C	5	22
TCGA-2Y-A9H1-01	C	2	9
TCGA-2Y-A9H3-01	C	2	22
TCGA-2Y-A9H4-01	C	6	19
TCGA-2Y-A9H7-01	C	3	10
TCGA-2Y-A9H8-01	C	13	40
TCGA-2Y-A9H9-01	C	4	11
TCGA-3K-AAZ8-01	C	1	7
TCGA-4R-AA8I-01	C	5	16
TCGA-5C-AAPD-01	C	10	28
TCGA-5R-AA1C-01	C	2	7
TCGA-5R-AAAM-01	C	5	12
TCGA-BC-A110-01	C	0	0
TCGA-BC-A69H-01	C	6	23
TCGA-BC-A69I-01	C	2	7
TCGA-BW-A5NO-01	C	3	25
TCGA-CC-A7IE-01	C	6	28
TCGA-CC-A7IF-01	C	6	23
TCGA-CC-A7IH-01	C	2	11
TCGA-CC-A9FS-01	C	9	23
TCGA-DD-A115-01	C	6	26
TCGA-DD-A11D-01	C	2	5
TCGA-DD-A1EA-01	C	1	3
TCGA-DD-A1EB-01	C	4	22
TCGA-DD-A1EF-01	C	4	24
TCGA-DD-A39V-01	C	2	6
TCGA-DD-A39Z-01	C	3	11
TCGA-DD-A3A3-01	C	3	8
TCGA-DD-A3A5-01	C	5	17
TCGA-DD-A3A7-01	C	8	32
TCGA-DD-A3A8-01	C	4	14
TCGA-DD-A3A9-01	C	6	20
TCGA-DD-A4NF-01	C	0	4
TCGA-DD-A73A-01	C	2	12
TCGA-DD-A73B-01	C	14	38
TCGA-DD-A73D-01	C	2	10
TCGA-DD-A73E-01	C	5	17
TCGA-DD-A73G-01	C	5	29
TCGA-DD-AAC8-01	C	2	11
TCGA-DD-AAC9-01	C	2	9
TCGA-DD-AACB-01	C	5	19
TCGA-DD-AACD-01	C	4	13
TCGA-DD-AACE-01	C	1	6
TCGA-DD-AACF-01	C	4	14
TCGA-DD-AACG-01	C	8	26
TCGA-DD-AACI-01	C	3	25
TCGA-DD-AACL-01	C	5	14
TCGA-DD-AACO-01	C	7	17
TCGA-DD-AACP-01	C	3	10
TCGA-DD-AACT-01	C	1	8
TCGA-DD-AACV-01	C	8	25
TCGA-DD-AACY-01	C	5	22
TCGA-DD-AAD0-01	C	6	23
TCGA-DD-AAD6-01	C	3	15
TCGA-DD-AAD8-01	C	3	14
TCGA-DD-AADC-01	C	13	39
TCGA-DD-AADF-01	C	5	39
TCGA-DD-AADG-01	C	4	13
TCGA-DD-AADM-01	C	9	31
TCGA-DD-AADN-01	C	5	24
TCGA-DD-AADO-01	C	8	38
TCGA-DD-AADP-01	C	9	23
TCGA-DD-AADQ-01	C	5	9
TCGA-DD-AADS-01	C	0	0
TCGA-DD-AADU-01	C	1	13
TCGA-DD-AAE1-01	C	3	16
TCGA-DD-AAE2-01	C	10	25
TCGA-DD-AAE3-01	C	2	21
TCGA-DD-AAE4-01	C	5	15
TCGA-DD-AAE6-01	C	9	41
TCGA-DD-AAE7-01	C	2	8
TCGA-DD-AAE9-01	C	4	9
TCGA-DD-AAEA-01	C	5	19
TCGA-DD-AAEB-01	C	3	7
TCGA-DD-AAEH-01	C	4	14
TCGA-DD-AAEI-01	C	5	16
TCGA-DD-AAEK-01	C	5	29
TCGA-DD-AAVP-01	C	9	28
TCGA-DD-AAVU-01	C	8	16
TCGA-DD-AAVX-01	C	1	8
TCGA-DD-AAVY-01	C	3	10
TCGA-DD-AAW1-01	C	1	5
TCGA-DD-AAW2-01	C	2	8
TCGA-DD-AAW3-01	C	4	13
TCGA-ED-A7PZ-01	C	7	25
TCGA-ED-A7XO-01	C	9	25
TCGA-EP-A12J-01	C	3	9
TCGA-ES-A2HS-01	C	2	9
TCGA-FV-A495-01	C	6	20
TCGA-FV-A4ZP-01	C	3	18
TCGA-G3-A25S-01	C	6	26
TCGA-G3-A25V-01	C	0	1
TCGA-G3-A3CJ-01	C	1	8
TCGA-G3-A3CK-01	C	0	4
TCGA-G3-A5SI-01	C	6	32
TCGA-G3-A6UC-01	C	2	9
TCGA-G3-A7M5-01	C	2	6
TCGA-G3-AAUZ-01	C	7	13
TCGA-G3-AAV0-01	C	2	16
TCGA-G3-AAV2-01	C	3	13
TCGA-G3-AAV3-01	C	2	8
TCGA-G3-AAV4-01	C	3	12
TCGA-GJ-A9DB-01	C	4	9
TCGA-KR-A7K2-01	C	2	9
TCGA-KR-A7K7-01	C	1	4
TCGA-KR-A7K8-01	C	0	24
TCGA-LG-A9QC-01	C	3	13
TCGA-LG-A9QD-01	C	1	7
TCGA-MI-A75C-01	C	2	10
TCGA-MI-A75H-01	C	2	9
TCGA-NI-A8LF-01	C	9	51
TCGA-RC-A6M4-01	C	4	19
TCGA-RC-A7SF-01	C	5	13
TCGA-RC-A7SH-01	C	8	26
TCGA-RG-A7D4-01	C	7	29
TCGA-WQ-A9G7-01	C	14	34
TCGA-WQ-AB4B-01	C	2	9
TCGA-WX-AA47-01	C	2	6
TCGA-XR-A8TF-01	C	4	14
TCGA-ZP-A9CY-01	C	1	6
TCGA-ZP-A9D4-01	C	2	8
TCGA-ZS-A9CD-01	C	1	6
TCGA-ZS-A9CE-01	C	4	17
TCGA-ZS-A9CF-01	C	11	38
TCGA-ZS-A9CG-01	C	1	6

## Sheet: Supplementary Table S4
Supplementary Table S4：The list of genes clustered in different modules.
Gene	dynamicModule	mergeModule
AADAT	grey	grey
AASS	grey	grey
ABCA8	grey	grey
ABCA9	grey	grey
ABCB6	grey	grey
ABCC9	grey	grey
ABLIM3	grey	grey
AC092171.4	grey	grey
AC104809.2	grey	grey
ACACB	grey	grey
ACAD11	grey	grey
ACADL	grey	grey
ACOT12	grey	grey
ACP5	grey	grey
ACSL1	grey	grey
ACSL4	grey	grey
ACSM1	grey	grey
ACSM3	grey	grey
ACSM5	grey	grey
ADAMTS1	blue	blue
ADAMTS2	blue	blue
ADAMTSL2	blue	blue
ADCY1	grey	grey
ADGRA3	grey	grey
ADGRG7	grey	grey
ADH1B	turquoise	turquoise
ADH4	turquoise	turquoise
ADM2	turquoise	turquoise
ADRA1A	grey	grey
ADRA1B	grey	grey
ADRA2B	grey	grey
AFM	grey	grey
AFP	grey	grey
AGAP5	grey	grey
AGAP9	grey	grey
AGXT2	grey	grey
AKR1B10	grey	grey
AKR1C1	grey	grey
AKR1C2	grey	grey
AKR1C8P	grey	grey
AKR1D1	grey	grey
AKR7L	grey	grey
ALDH1A1	grey	grey
ALDH3A1	grey	grey
ALDH8A1	grey	grey
ALDOA	turquoise	turquoise
ALG1L	grey	grey
ALOX12P2	grey	grey
ALPL	grey	grey
AMDHD1	grey	grey
AMN	grey	grey
ANGPTL6	grey	grey
ANK3	blue	blue
ANKRD29	grey	grey
ANLN	turquoise	turquoise
ANXA10	grey	grey
ANXA13	grey	grey
ANXA2	turquoise	turquoise
ANXA2P2	turquoise	turquoise
AP1M2	grey	grey
APLN	grey	grey
APOA2	grey	grey
APOA4	grey	grey
APOA5	grey	grey
APOBEC3B	grey	grey
APOF	grey	grey
APOLD1	blue	blue
AQP3	grey	grey
ARHGAP10	grey	grey
ARHGEF39	turquoise	turquoise
ARRDC2	grey	grey
ASF1B	turquoise	turquoise
ASMTL-AS1	grey	grey
ASPDH	turquoise	turquoise
ASPG	grey	grey
ASPH	grey	grey
ASPM	turquoise	turquoise
ATAD2	turquoise	turquoise
ATF5	grey	grey
ATOH8	grey	grey
ATP1B1	grey	grey
ATP1B3	turquoise	turquoise
AURKA	turquoise	turquoise
AURKB	turquoise	turquoise
AUTS2	grey	grey
AVPR1A	grey	grey
AZGP1	grey	grey
AZGP1P1	grey	grey
B3GAT1	grey	grey
B3GNT3	grey	grey
B3GNT5	grey	grey
BAMBI	grey	grey
BBOX1	grey	grey
BCAM	grey	grey
BCAS4	turquoise	turquoise
BCHE	grey	grey
BCO2	grey	grey
BEX2	grey	grey
BGN	blue	blue
BHMT	grey	grey
BIRC5	turquoise	turquoise
BLVRA	turquoise	turquoise
BMPER	blue	blue
BMS1P8	grey	grey
BUB1	turquoise	turquoise
BUB1B	turquoise	turquoise
C11orf96	blue	blue
C12orf75	turquoise	turquoise
C14orf180	grey	grey
C15orf39	turquoise	turquoise
C15orf48	grey	grey
C1QA	brown	brown
C1QTNF1	blue	blue
C1R	grey	grey
C3P1	grey	grey
C6	turquoise	turquoise
C7	blue	blue
C8A	grey	grey
C9	grey	grey
CACNA1H	grey	grey
CACNB2	grey	grey
CADM1	grey	grey
CAMK2B	grey	grey
CAP2	grey	grey
CAPG	brown	brown
CAPN3	grey	grey
CBFA2T3	blue	blue
CBR1	grey	grey
CBS	grey	grey
CCBE1	blue	blue
CCDC28B	turquoise	turquoise
CCDC34	turquoise	turquoise
CCDC80	blue	blue
CCL14	grey	grey
CCL18	brown	brown
CCL19	blue	blue
CCL20	grey	grey
CCL21	blue	blue
CCL23	grey	grey
CCNA2	turquoise	turquoise
CCNB1	turquoise	turquoise
CCNB2	turquoise	turquoise
CCNE1	turquoise	turquoise
CD163L1	grey	grey
CD1D	grey	grey
CD24	grey	grey
CD248	blue	blue
CD36	grey	grey
CD3D	brown	brown
CD5L	grey	grey
CD74	brown	brown
CDA	grey	grey
CDC20	turquoise	turquoise
CDC25C	turquoise	turquoise
CDC45	turquoise	turquoise
CDC6	turquoise	turquoise
CDCA3	turquoise	turquoise
CDCA5	turquoise	turquoise
CDCA8	turquoise	turquoise
CDHR2	grey	grey
CDK1	turquoise	turquoise
CDKN2A	turquoise	turquoise
CDKN2B	grey	grey
CDKN2C	turquoise	turquoise
CDKN3	turquoise	turquoise
CDT1	turquoise	turquoise
CENPA	turquoise	turquoise
CENPF	turquoise	turquoise
CENPH	turquoise	turquoise
CENPK	turquoise	turquoise
CENPL	turquoise	turquoise
CENPM	turquoise	turquoise
CENPU	turquoise	turquoise
CENPW	turquoise	turquoise
CES3	grey	grey
CES4A	grey	grey
CFHR3	grey	grey
CFP	brown	brown
CGREF1	grey	grey
CHEK1	turquoise	turquoise
CHRNA4	grey	grey
CHST4	grey	grey
CIDEB	grey	grey
CKAP2	turquoise	turquoise
CKB	grey	grey
CKS2	turquoise	turquoise
CLDN10	grey	grey
CLDN15	grey	grey
CLDN2	grey	grey
CLDN7	grey	grey
CLEC1B	grey	grey
CLEC4G	grey	grey
CLEC4M	grey	grey
CLGN	turquoise	turquoise
CLRN3	grey	grey
CMTM7	turquoise	turquoise
CNDP1	grey	grey
CNTFR	grey	grey
CNTN3	grey	grey
COCH	grey	grey
COL15A1	blue	blue
COL1A1	blue	blue
COL1A2	blue	blue
COL27A1	grey	grey
COL4A1	blue	blue
COL4A2	blue	blue
COLEC10	blue	blue
COLEC11	blue	blue
COX4I2	grey	grey
COX6A2	grey	grey
COX6B1P4	grey	grey
CPE	grey	grey
CPEB3	grey	grey
CPED1	grey	grey
CPT1B	grey	grey
CPVL	brown	brown
CRHBP	blue	blue
CRIP1	brown	brown
CRNDE	grey	grey
CRP	grey	grey
CSF3R	brown	brown
CTHRC1	turquoise	turquoise
CTSC	brown	brown
CTSS	brown	brown
CXCL10	brown	brown
CXCL12	blue	blue
CXCL14	blue	blue
CXCL2	grey	grey
CXCL9	brown	brown
CYP1A1	grey	grey
CYP1A2	grey	grey
CYP21A1P	grey	grey
CYP21A2	grey	grey
CYP26A1	grey	grey
CYP2A6	grey	grey
CYP2A7	grey	grey
CYP2B6	grey	grey
CYP2B7P	grey	grey
CYP2C19	grey	grey
CYP2C8	grey	grey
CYP2C9	grey	grey
CYP2D7	grey	grey
CYP2E1	grey	grey
CYP39A1	grey	grey
CYP3A4	grey	grey
CYP3A43	grey	grey
CYP3A5	grey	grey
CYP4A11	grey	grey
CYP4A22	grey	grey
CYP7A1	grey	grey
CYP8B1	grey	grey
DAPK2	grey	grey
DBH	grey	grey
DBH-AS1	grey	grey
DBN1	turquoise	turquoise
DBNDD1	grey	grey
DBNDD2	turquoise	turquoise
DCDC2	grey	grey
DCN	blue	blue
DDX3Y	grey	grey
DES	blue	blue
DHFRP1	turquoise	turquoise
DHODH	grey	grey
DIO3OS	grey	grey
DIRAS3	grey	grey
DLGAP5	turquoise	turquoise
DNAJC12	grey	grey
DNASE1L3	turquoise	turquoise
DPP4	grey	grey
DPT	blue	blue
DTD1	grey	grey
DTL	turquoise	turquoise
DTNA	grey	grey
DTX1	grey	grey
DTX4	grey	grey
DUSP1	grey	grey
DUSP9	turquoise	turquoise
DUXAP8	grey	grey
E2F1	turquoise	turquoise
EBF4	grey	grey
ECM1	blue	blue
ECT2	turquoise	turquoise
EEF1A1P5	grey	grey
EEF1A2	grey	grey
EFHD1	grey	grey
EGR1	grey	grey
EIF5AP4	grey	grey
ELOVL2	grey	grey
EMCN	blue	blue
EMP1	blue	blue
ENAH	turquoise	turquoise
ENO3	grey	grey
ENPP2	grey	grey
EPHX1	grey	grey
EPHX2	grey	grey
EPO	grey	grey
EPS8L3	grey	grey
ERICH5	grey	grey
ERRFI1	grey	grey
ESM1	grey	grey
ESR1	grey	grey
ETV4	grey	grey
EXO1	turquoise	turquoise
EXOC3L4	grey	grey
EZH2	turquoise	turquoise
F11-AS1	grey	grey
F5	grey	grey
F9	grey	grey
FABP4	grey	grey
FABP5	turquoise	turquoise
FAM111B	turquoise	turquoise
FAM13A	grey	grey
FAM151A	grey	grey
FAM163B	blue	blue
FAM180A	blue	blue
FAM222A	turquoise	turquoise
FAM3B	grey	grey
FAM83A-AS1	grey	grey
FAM83D	turquoise	turquoise
FAM99A	grey	grey
FAM99B	grey	grey
FANCC	turquoise	turquoise
FANCD2	turquoise	turquoise
FANCI	turquoise	turquoise
FASN	grey	grey
FAT1	grey	grey
FBLN1	blue	blue
FBLN7	grey	grey
FBP1	grey	grey
FBXO32	grey	grey
FCGR2B	grey	grey
FCN2	grey	grey
FCN3	blue	blue
FEN1	turquoise	turquoise
FGB	grey	grey
FGL1	grey	grey
FITM1	grey	grey
FLVCR1	turquoise	turquoise
FNDC4	grey	grey
FOLH1B	grey	grey
FOLR2	brown	brown
FOS	grey	grey
FOSB	grey	grey
FOXM1	turquoise	turquoise
FOXRED2	turquoise	turquoise
FPR1	brown	brown
FST	grey	grey
FTL	grey	grey
FXYD1	grey	grey
G0S2	grey	grey
G6PD	turquoise	turquoise
GABBR1	blue	blue
GABRD	blue	blue
GADD45B	grey	grey
GAS5	grey	grey
GBA3	grey	grey
GBP2	grey	grey
GBP7	grey	grey
GCGR	grey	grey
GCH1	grey	grey
GCKR	grey	grey
GDF15	grey	grey
GGH	grey	grey
GGT5	blue	blue
GHR	grey	grey
GINS1	turquoise	turquoise
GINS2	turquoise	turquoise
GJA1	blue	blue
GJA5	blue	blue
GLS2	grey	grey
GLUL	grey	grey
GLYAT	grey	grey
GLYATL1	grey	grey
GMNN	turquoise	turquoise
GNAO1	grey	grey
GNAZ	turquoise	turquoise
GNMT	grey	grey
GOLGA6L5P	grey	grey
GOLGA8B	grey	grey
GOLGA8N	grey	grey
GOLM1	grey	grey
GPC3	grey	grey
GPD1	grey	grey
GPM6A	blue	blue
GPNMB	brown	brown
GPSM1	grey	grey
GRAMD1A	turquoise	turquoise
GRAMD1C	grey	grey
GREM2	grey	grey
GSTA4	grey	grey
GSTM1	grey	grey
GSTM2	grey	grey
GSTT2B	grey	grey
GSTZ1	grey	grey
GYS2	grey	grey
H19	grey	grey
HAL	grey	grey
HAMP	grey	grey
HAND2	blue	blue
HAND2-AS1	blue	blue
HAO2	grey	grey
HBA1	grey	grey
HBA2	grey	grey
HBB	grey	grey
HCST	brown	brown
HELLS	turquoise	turquoise
HERC2P2	turquoise	turquoise
HGF	blue	blue
HGFAC	grey	grey
HHIP	blue	blue
HJURP	turquoise	turquoise
HK3	brown	brown
HKDC1	grey	grey
HLA-B	brown	brown
HLA-DMA	brown	brown
HLA-DMB	brown	brown
HLA-DPA1	brown	brown
HLA-DPB1	brown	brown
HLA-DQA1	brown	brown
HLA-DQA2	brown	brown
HLA-DQB1	brown	brown
HLA-DRA	brown	brown
HLA-DRB1	brown	brown
HLA-DRB5	brown	brown
HLA-DRB6	brown	brown
HLA-F	grey	grey
HLA-H	grey	grey
HMGA1	turquoise	turquoise
HMMR	turquoise	turquoise
HOGA1	grey	grey
HOMER3	turquoise	turquoise
HP	grey	grey
HPGD	grey	grey
HPN-AS1	grey	grey
HPX	grey	grey
HRCT1	grey	grey
HSD11B1	grey	grey
HSD17B13	grey	grey
HSPB1P1	grey	grey
HSPG2	blue	blue
HULC	grey	grey
ID1	grey	grey
IDO2	grey	grey
IFI27	grey	grey
IFI27L2	brown	brown
IFI30	turquoise	turquoise
IFI6	grey	grey
IFITM10	grey	grey
IGF1	grey	grey
IGF2	grey	grey
IGF2BP2	turquoise	turquoise
IGFALS	grey	grey
IGFBP3	grey	grey
IGHA1	brown	brown
IGHA2	brown	brown
IGHG2	brown	brown
IGHG4	brown	brown
IGHM	brown	brown
IGHV2-5	brown	brown
IGKC	brown	brown
IGKV1-27	brown	brown
IGKV1-9	brown	brown
IGKV2-24	brown	brown
IGKV3-11	brown	brown
IGKV3-20	brown	brown
IGLC2	brown	brown
IGLC3	brown	brown
IGLV1-40	brown	brown
IGLV1-51	brown	brown
IGLV2-11	brown	brown
IGLV2-14	brown	brown
IGLV2-8	brown	brown
IGLV3-25	brown	brown
IGSF9	grey	grey
IL1RAP	grey	grey
IL1RL1	blue	blue
IL32	grey	grey
INHBB	grey	grey
INMT	blue	blue
IP6K3	grey	grey
IQGAP3	turquoise	turquoise
IRF6	grey	grey
ISG15	grey	grey
ITGB4	turquoise	turquoise
ITIH4-AS1	grey	grey
ITPKA	turquoise	turquoise
JCHAIN	brown	brown
KAZN	blue	blue
KBTBD11	grey	grey
KCND3	grey	grey
KCNK5	grey	grey
KCNN2	grey	grey
KCTD17	turquoise	turquoise
KDELR3	grey	grey
KDM8	grey	grey
KIF20A	turquoise	turquoise
KIF23	turquoise	turquoise
KIF2C	turquoise	turquoise
KIF4A	turquoise	turquoise
KIFC1	turquoise	turquoise
KMO	grey	grey
KPNA2	turquoise	turquoise
KRT17P4	grey	grey
KRT23	grey	grey
KRTCAP3	grey	grey
LAMA3	grey	grey
LAPTM4B	turquoise	turquoise
LAPTM5	brown	brown
LCAT	grey	grey
LCN2	grey	grey
LEF1	grey	grey
LGALS3	grey	grey
LGALS3BP	grey	grey
LGALS4	grey	grey
LGALS9	brown	brown
LHX2	grey	grey
LIFR	grey	grey
LILRB5	brown	brown
LINC00106	grey	grey
LINC00511	grey	grey
LINC00659	grey	grey
LINC00665	grey	grey
LINC00844	grey	grey
LINC01018	grey	grey
LINC01093	grey	grey
LINC01320	grey	grey
LINC01348	grey	grey
LINC01370	grey	grey
LINC01554	grey	grey
LINC01595	grey	grey
LIPG	grey	grey
LMNB1	turquoise	turquoise
LOXL4	grey	grey
LPA	grey	grey
LPAL2	grey	grey
LRCOL1	grey	grey
LRG1	grey	grey
LRRC1	turquoise	turquoise
LSMEM1	grey	grey
LTB	brown	brown
LY6E	grey	grey
LY6G5B	turquoise	turquoise
LY96	grey	grey
LYPD1	grey	grey
LYVE1	grey	grey
LYZ	grey	grey
MAD2L1	turquoise	turquoise
MAGED1	turquoise	turquoise
MAGI2-AS3	grey	grey
MAMDC4	grey	grey
MAN1C1	grey	grey
MANEAL	grey	grey
MAP2	grey	grey
MARCKS	turquoise	turquoise
MARCKSL1	turquoise	turquoise
MARCO	brown	brown
MAT1A	grey	grey
MBL1P	grey	grey
MBL2	grey	grey
MCC	grey	grey
MCM2	turquoise	turquoise
MCM3	turquoise	turquoise
MCM4	turquoise	turquoise
MCM5	turquoise	turquoise
MCM6	turquoise	turquoise
MDK	turquoise	turquoise
MEG3	grey	grey
MELK	turquoise	turquoise
MESP1	grey	grey
MFAP3L	grey	grey
MFAP4	blue	blue
MFSD2A	grey	grey
MGP	blue	blue
MKI67	turquoise	turquoise
MME	grey	grey
MMP11	turquoise	turquoise
MMP14	turquoise	turquoise
MMP9	brown	brown
MND1	turquoise	turquoise
MOGAT2	grey	grey
MPPED1	grey	grey
MRC1	grey	grey
MST1L	grey	grey
MST1P2	grey	grey
MT-ND4L	grey	grey
MT-ND5	grey	grey
MT1A	grey	grey
MT1DP	grey	grey
MT1E	grey	grey
MT1F	grey	grey
MT1G	grey	grey
MT1H	grey	grey
MT1L	grey	grey
MT1M	grey	grey
MT1X	grey	grey
MT1XP1	grey	grey
MT2A	grey	grey
MT2P1	grey	grey
MTHFD1L	turquoise	turquoise
MTND2P28	grey	grey
MTND4P12	grey	grey
MTND4P20	grey	grey
MUC13	grey	grey
MUC3A	grey	grey
MUC6	grey	grey
MYBL2	turquoise	turquoise
MYOM2	grey	grey
NAMPT	grey	grey
NAT2	grey	grey
NBPF8	grey	grey
NCAPG	turquoise	turquoise
NCAPG2	turquoise	turquoise
NCAPH	turquoise	turquoise
NDC80	turquoise	turquoise
NEAT1	grey	grey
NEK2	turquoise	turquoise
NEU4	grey	grey
NFKBIZ	grey	grey
NGFR	blue	blue
NIPAL2	grey	grey
NMB	turquoise	turquoise
NNMT	grey	grey
NOMO2	turquoise	turquoise
NOTCH3	blue	blue
NPC1L1	grey	grey
NPIPB3	grey	grey
NPIPB4	grey	grey
NPIPB5	grey	grey
NPM3	turquoise	turquoise
NPY1R	blue	blue
NQO1	grey	grey
NR1I2	grey	grey
NR4A1	grey	grey
NREP	turquoise	turquoise
NRG1	grey	grey
NRM	turquoise	turquoise
NT5DC2	turquoise	turquoise
NTF3	blue	blue
NUF2	turquoise	turquoise
NUSAP1	turquoise	turquoise
OAT	grey	grey
OGDHL	grey	grey
OIP5	turquoise	turquoise
OIT3	grey	grey
OLFM2	grey	grey
OLFML2A	blue	blue
OLFML2B	blue	blue
OLFML3	blue	blue
OR10J6P	grey	grey
OR2I1P	grey	grey
ORM1	grey	grey
ORM2	grey	grey
OSGIN1	grey	grey
OXT	grey	grey
P3H4	turquoise	turquoise
P4HA2	grey	grey
PABPC1L	turquoise	turquoise
PAFAH1B3	turquoise	turquoise
PALM3	grey	grey
PAMR1	blue	blue
PAQR4	turquoise	turquoise
PARPBP	turquoise	turquoise
PARVB	grey	grey
PBK	turquoise	turquoise
PBLD	grey	grey
PCK1	grey	grey
PDGFA	grey	grey
PDGFRA	blue	blue
PDGFRB	blue	blue
PDZK1IP1	grey	grey
PEG10	grey	grey
PEMT	grey	grey
PHF19	turquoise	turquoise
PHLDA2	grey	grey
PHLDA3	grey	grey
PHYHD1	grey	grey
PIK3IP1	grey	grey
PILRB	grey	grey
PIR	grey	grey
PKM	turquoise	turquoise
PKMYT1	turquoise	turquoise
PLA2G2A	grey	grey
PLA2G4B	grey	grey
PLA2G4C	grey	grey
PLAC8	brown	brown
PLAU	blue	blue
PLCH2	grey	grey
PLGLA	grey	grey
PLGLB1	grey	grey
PLGLB2	grey	grey
PLIN1	grey	grey
PLIN4	grey	grey
PLK1	turquoise	turquoise
PLP2	turquoise	turquoise
PLSCR4	grey	grey
PNMA6A	grey	grey
PNPLA7	grey	grey
PODN	blue	blue
PODXL	blue	blue
POLD1	turquoise	turquoise
PPDPF	grey	grey
PPP1R3B	grey	grey
PPP1R3C	grey	grey
PRAP1	grey	grey
PRC1	turquoise	turquoise
PRELP	blue	blue
PRIM1	turquoise	turquoise
PROZ	grey	grey
PRR11	turquoise	turquoise
PRR34-AS1	grey	grey
PRSS2	grey	grey
PRSS53	grey	grey
PRSS8	grey	grey
PSMB9	brown	brown
PSPH	turquoise	turquoise
PTGIS	blue	blue
PTH1R	blue	blue
PTP4A3	grey	grey
PTPRS	blue	blue
PTTG1	turquoise	turquoise
PVT1	grey	grey
PYCARD	brown	brown
PYCR1	grey	grey
PZP	grey	grey
RAB11FIP4	turquoise	turquoise
RAC3	grey	grey
RACGAP1	turquoise	turquoise
RAD51	turquoise	turquoise
RAD51AP1	turquoise	turquoise
RAMP1	grey	grey
RASD1	grey	grey
RASGEF1B	grey	grey
RASSF3	turquoise	turquoise
RBP7	grey	grey
RDH16	grey	grey
RECQL4	turquoise	turquoise
RFC4	turquoise	turquoise
RGS10	brown	brown
RGS5	blue	blue
RIC3	grey	grey
RMI2	turquoise	turquoise
RNASE1	brown	brown
RNASEH2A	turquoise	turquoise
RND3	grey	grey
RNF157	grey	grey
RNF165	grey	grey
RNU4-2	grey	grey
ROBO1	grey	grey
RP11-115J16.1	grey	grey
RP11-394O4.5	blue	blue
RP11-556E13.1	grey	grey
RP11-69E11.4	grey	grey
RPL22L1	grey	grey
RPL35P5	grey	grey
RPL37P6	grey	grey
RPL39L	grey	grey
RPL39P3	grey	grey
RPL39P40	grey	grey
RPL7P1	grey	grey
RPL7P9	grey	grey
RPLP0P6	grey	grey
RPS28P7	grey	grey
RRAGD	grey	grey
RRM2	turquoise	turquoise
RRN3P1	grey	grey
RSPO3	blue	blue
RTN2	grey	grey
S100A11	turquoise	turquoise
S100A12	grey	grey
S100A13	grey	grey
S100A4	brown	brown
S100A6	turquoise	turquoise
S100A8	grey	grey
S100A9	grey	grey
S100P	grey	grey
SAA1	grey	grey
SAA2	grey	grey
SAA2-SAA4	grey	grey
SAA4	grey	grey
SAMD5	grey	grey
SATB1	grey	grey
SCAMP5	grey	grey
SCARA3	grey	grey
SCARNA12	grey	grey
SCD	grey	grey
SCPEP1	grey	grey
SDS	grey	grey
SEC14L4	grey	grey
SECTM1	grey	grey
SEMA3G	blue	blue
SERPINA3	grey	grey
SERPINE1	grey	grey
SERPINH1	turquoise	turquoise
SERPINI1	turquoise	turquoise
SEZ6L2	grey	grey
SFN	grey	grey
SFRP5	grey	grey
SHISA4	grey	grey
SIK1	grey	grey
SKA1	turquoise	turquoise
SKA3	turquoise	turquoise
SKAP1	grey	grey
SLAIN1	grey	grey
SLAMF8	brown	brown
SLC10A1	grey	grey
SLC11A1	grey	grey
SLC12A5	grey	grey
SLC13A5	grey	grey
SLC17A9	grey	grey
SLC22A1	grey	grey
SLC25A18	grey	grey
SLC25A27	grey	grey
SLC25A47	grey	grey
SLC27A5	turquoise	turquoise
SLC28A1	grey	grey
SLC39A5	grey	grey
SLC3A1	grey	grey
SLC43A2	grey	grey
SLC44A3	grey	grey
SLC46A3	grey	grey
SLC51B	grey	grey
SLC6A13	grey	grey
SLC6A8	grey	grey
SLC7A2	grey	grey
SLCO1B3	grey	grey
SMIM24	grey	grey
SMO	grey	grey
SMOX	turquoise	turquoise
SMUG1P1	grey	grey
SMYD2	grey	grey
SNCG	grey	grey
SNHG6	turquoise	turquoise
SNRPGP15	grey	grey
SOCS3	blue	blue
SORL1	grey	grey
SORT1	grey	grey
SOWAHA	grey	grey
SOX12	turquoise	turquoise
SOX4	turquoise	turquoise
SOX9	grey	grey
SOX9-AS1	grey	grey
SPA17	grey	grey
SPAG4	grey	grey
SPARC	blue	blue
SPARCL1	grey	grey
SPATC1L	turquoise	turquoise
SPC24	turquoise	turquoise
SPC25	turquoise	turquoise
SPINK1	grey	grey
SPON2	grey	grey
SPP1	grey	grey
SPTBN2	grey	grey
SQLE	grey	grey
SQSTM1	grey	grey
SRC	turquoise	turquoise
SRD5A2	grey	grey
SRPX	blue	blue
SRXN1	grey	grey
ST14	grey	grey
ST8SIA6-AS1	grey	grey
STAB2	blue	blue
STAG3L5P	grey	grey
STARD5	grey	grey
STAT1	brown	brown
STC1	grey	grey
STEAP3	grey	grey
STEAP4	grey	grey
STK39	grey	grey
STMN1	turquoise	turquoise
STXBP6	grey	grey
SULT1B1	grey	grey
SULT1C2	grey	grey
SULT1E1	grey	grey
SUMO2P1	grey	grey
SUSD4	grey	grey
SYNGR1	grey	grey
SYT7	grey	grey
SYT9	grey	grey
TACC3	turquoise	turquoise
TAT	grey	grey
TAX1BP3	turquoise	turquoise
TBX15	grey	grey
TCF19	turquoise	turquoise
TDO2	grey	grey
TDRKH	turquoise	turquoise
TEAD2	turquoise	turquoise
TENM1	grey	grey
TESC	grey	grey
TGFBI	grey	grey
TGM2	grey	grey
TGM3	grey	grey
THBS4	grey	grey
THRSP	grey	grey
THY1	blue	blue
TK1	turquoise	turquoise
TKT	grey	grey
TLCD1	turquoise	turquoise
TM4SF1	grey	grey
TM4SF4	grey	grey
TM4SF5	grey	grey
TM7SF2	grey	grey
TMCO3	turquoise	turquoise
TMED3	turquoise	turquoise
TMEM132A	turquoise	turquoise
TMEM150B	grey	grey
TMEM164	turquoise	turquoise
TMEM184A	grey	grey
TMEM25	grey	grey
TMEM45A	grey	grey
TMEM45B	grey	grey
TMEM82	grey	grey
TMEM98	grey	grey
TMSB10	turquoise	turquoise
TNFRSF12A	grey	grey
TNFRSF21	turquoise	turquoise
TNFRSF4	grey	grey
TNFSF14	grey	grey
TOP2A	turquoise	turquoise
TPPP2	grey	grey
TPPP3	blue	blue
TPRG1	grey	grey
TPX2	turquoise	turquoise
TRAC	brown	brown
TRAIP	turquoise	turquoise
TRBC2	brown	brown
TREM2	brown	brown
TRIM16	grey	grey
TRIM16L	grey	grey
TRIM31	turquoise	turquoise
TRIP13	turquoise	turquoise
TRNP1	turquoise	turquoise
TROAP	turquoise	turquoise
TRPM8	grey	grey
TRPV4	grey	grey
TSLP	grey	grey
TSPAN15	turquoise	turquoise
TSPAN8	grey	grey
TTC36	turquoise	turquoise
TTC39A	grey	grey
TTC9	grey	grey
TTTY14	grey	grey
TUBB2A	grey	grey
TXNRD1	grey	grey
TYMS	turquoise	turquoise
TYMSOS	turquoise	turquoise
U91328.1	grey	grey
UBD	grey	grey
UBE2C	turquoise	turquoise
UBE2Q2	turquoise	turquoise
UBE2S	turquoise	turquoise
UBE2SP2	turquoise	turquoise
UBE2T	turquoise	turquoise
UCP2	brown	brown
UGT1A10	grey	grey
UGT1A6	grey	grey
UGT2B11	grey	grey
UGT2B17	grey	grey
UHRF1	turquoise	turquoise
UNC13D	brown	brown
UROC1	grey	grey
USP9Y	grey	grey
VAT1	turquoise	turquoise
VIL1	turquoise	turquoise
VIPR1	grey	grey
VNN1	grey	grey
VWF	grey	grey
WDR72	grey	grey
WDR76	turquoise	turquoise
XAF1	grey	grey
YJEFN3	turquoise	turquoise
ZIC2	turquoise	turquoise
ZNF160	grey	grey
ZNF28	turquoise	turquoise
ZP3	grey	grey
ZWINT	turquoise	turquoise

## Sheet: Supplementary Table S5
Supplementary Table S5：The genes with |MM| > 0.8 and |GS| > 0.1 were selected as hub genes in the turquoise module.
Gene	Module	MM_R	MM_pvalue	GS_R	GS_pvalue
ANLN	turquoise	0.919489	1.07865e-151	0.518883	5.84068e-27
ARHGEF39	turquoise	0.858284	5.91556e-109	0.462114	5.01863e-21
ASF1B	turquoise	0.916568	5.85739e-149	0.468688	1.17133e-21
ASPM	turquoise	0.861271	1.55739e-110	0.448291	9.67061e-20
AURKB	turquoise	0.891116	1.10244e-128	0.378135	4.67698e-14
BIRC5	turquoise	0.911418	2.25509e-144	0.444493	2.12979e-19
BUB1	turquoise	0.937693	1.7436e-171	0.507712	1.05531e-25
BUB1B	turquoise	0.944519	1.67261e-180	0.525883	9.0101e-28
CCNA2	turquoise	0.86299	1.84732e-111	0.477746	1.49769e-22
CCNB1	turquoise	0.937017	1.20007e-170	0.478859	1.15829e-22
CCNB2	turquoise	0.939803	3.69421e-174	0.462864	4.25752e-21
CDC20	turquoise	0.91479	2.41745e-147	0.490058	8.27631e-24
CDC25C	turquoise	0.867616	5.1344e-114	0.407281	2.94721e-16
CDC45	turquoise	0.921541	1.11675e-153	0.469319	1.01705e-21
CDC6	turquoise	0.918331	1.34484e-150	0.503116	3.36714e-25
CDCA3	turquoise	0.918317	1.38648e-150	0.41115	1.4476e-16
CDCA5	turquoise	0.935522	7.90302e-169	0.470967	7.02085e-22
CDCA8	turquoise	0.939877	2.96854e-174	0.551359	6.85195e-31
CDK1	turquoise	0.94747	9.18879e-185	0.461124	6.23067e-21
CDKN3	turquoise	0.879283	6.48002e-121	0.388674	7.93103e-15
CDT1	turquoise	0.893813	1.39813e-130	0.454783	2.45076e-20
CENPA	turquoise	0.934091	3.96363e-167	0.477707	1.51105e-22
CENPF	turquoise	0.912984	9.75497e-146	0.47422	3.35971e-22
CENPH	turquoise	0.882667	4.73881e-123	0.48447	3.12524e-23
CENPK	turquoise	0.881548	2.45186e-122	0.505509	1.84441e-25
CENPL	turquoise	0.888213	1.06943e-126	0.509619	6.48814e-26
CENPM	turquoise	0.883862	8.04552e-124	0.431104	3.18786e-18
CENPW	turquoise	0.831387	3.48361e-96	0.442178	3.42955e-19
CHEK1	turquoise	0.864238	3.85669e-112	0.510556	5.10269e-26
CKS2	turquoise	0.806085	4.40277e-86	0.456472	1.70633e-20
DLGAP5	turquoise	0.932547	2.45323e-165	0.494961	2.52719e-24
DTL	turquoise	0.896346	2.07474e-132	0.474489	3.15961e-22
E2F1	turquoise	0.844056	6.75308e-102	0.425017	1.04882e-17
ECT2	turquoise	0.891587	5.18154e-129	0.543582	6.55104e-30
EXO1	turquoise	0.92842	9.52516e-161	0.472737	4.70631e-22
EZH2	turquoise	0.918102	2.20525e-150	0.520961	3.36842e-27
FANCD2	turquoise	0.928741	4.2807e-161	0.502849	3.60013e-25
FANCI	turquoise	0.933548	1.71024e-166	0.516608	1.06209e-26
FEN1	turquoise	0.868835	1.0492e-114	0.484008	3.48489e-23
FOXM1	turquoise	0.916026	1.83404e-148	0.480777	7.42192e-23
GINS1	turquoise	0.941415	2.87835e-176	0.5022	4.2335e-25
HELLS	turquoise	0.889922	7.34846e-128	0.471379	6.39851e-22
HJURP	turquoise	0.944254	3.92573e-180	0.473992	3.53877e-22
HMMR	turquoise	0.845272	1.79539e-102	0.476905	1.81766e-22
KIF20A	turquoise	0.918649	6.75662e-151	0.490456	7.522e-24
KIF23	turquoise	0.952756	4.79563e-193	0.540865	1.42177e-29
KIF2C	turquoise	0.948807	8.96458e-187	0.515018	1.60928e-26
KIF4A	turquoise	0.945604	4.84019e-182	0.508169	9.39523e-26
KIFC1	turquoise	0.944578	1.38264e-180	0.445883	1.59712e-19
KPNA2	turquoise	0.874861	3.21769e-118	0.537908	3.2782e-29
LMNB1	turquoise	0.909978	3.85209e-143	0.498014	1.19586e-24
MAD2L1	turquoise	0.898417	6.10779e-134	0.504929	2.13516e-25
MCM2	turquoise	0.909673	6.98216e-143	0.502758	3.68249e-25
MCM3	turquoise	0.859089	2.23725e-109	0.475776	2.35505e-22
MCM4	turquoise	0.867286	7.87047e-114	0.495514	2.20821e-24
MCM5	turquoise	0.852272	6.98878e-106	0.44799	1.02982e-19
MCM6	turquoise	0.884283	4.29309e-124	0.542902	7.95816e-30
MELK	turquoise	0.925177	2.49161e-157	0.524226	1.40792e-27
MKI67	turquoise	0.919582	8.77682e-152	0.466682	1.83227e-21
MYBL2	turquoise	0.916224	1.2106e-148	0.441924	3.61317e-19
NCAPG	turquoise	0.942683	5.71501e-178	0.499699	7.88668e-25
NCAPG2	turquoise	0.817156	2.61107e-90	0.545363	3.92678e-30
NCAPH	turquoise	0.930844	2.08032e-163	0.526274	8.10742e-28
NDC80	turquoise	0.928638	5.54313e-161	0.490348	7.7197e-24
NEK2	turquoise	0.918094	2.24556e-150	0.457714	1.30585e-20
NRM	turquoise	0.826995	2.58439e-94	0.443083	2.84838e-19
NUF2	turquoise	0.933141	5.08043e-166	0.498292	1.1168e-24
NUSAP1	turquoise	0.913325	4.88496e-146	0.504145	2.60059e-25
OIP5	turquoise	0.879327	6.08651e-121	0.446946	1.28055e-19
PARPBP	turquoise	0.896509	1.57712e-132	0.45059	5.9679e-20
PBK	turquoise	0.8715	3.08262e-116	0.476608	1.94593e-22
PHF19	turquoise	0.881712	1.92742e-122	0.506771	1.34029e-25
PKMYT1	turquoise	0.880959	5.7822e-122	0.481794	5.85546e-23
PLK1	turquoise	0.953802	8.50195e-195	0.503598	2.98375e-25
POLD1	turquoise	0.863448	1.04061e-111	0.492836	4.23635e-24
PRC1	turquoise	0.931791	1.78564e-164	0.514155	2.014e-26
PRR11	turquoise	0.93363	1.37278e-166	0.505786	1.71968e-25
PTTG1	turquoise	0.867641	4.97243e-114	0.393186	3.6375e-15
RACGAP1	turquoise	0.902762	2.91575e-137	0.494179	3.05761e-24
RAD51	turquoise	0.920577	9.7028e-153	0.474841	2.91588e-22
RAD51AP1	turquoise	0.873104	3.55196e-117	0.476083	2.1949e-22
RFC4	turquoise	0.902584	4.01517e-137	0.4985	1.06086e-24
RMI2	turquoise	0.818123	1.08181e-90	0.456959	1.53675e-20
RNASEH2A	turquoise	0.816713	3.9034e-90	0.464356	3.06603e-21
RRM2	turquoise	0.893891	1.22955e-130	0.444463	2.14319e-19
SKA1	turquoise	0.911363	2.51988e-144	0.462683	4.42968e-21
SKA3	turquoise	0.92453	1.1455e-156	0.445465	1.74177e-19
SPC25	turquoise	0.933989	5.22322e-167	0.45984	8.24075e-21
STMN1	turquoise	0.86697	1.18401e-113	0.474451	3.18746e-22
TACC3	turquoise	0.921142	2.7412e-153	0.491859	5.36539e-24
TCF19	turquoise	0.872743	5.79074e-117	0.450617	5.93368e-20
TOP2A	turquoise	0.936165	1.32009e-169	0.503305	3.211e-25
TPX2	turquoise	0.949867	2.08661e-188	0.490828	6.8778e-24
TRAIP	turquoise	0.846583	4.25433e-103	0.477636	1.53605e-22
TRIP13	turquoise	0.925404	1.45017e-157	0.492623	4.46058e-24
TROAP	turquoise	0.920281	1.87677e-152	0.435348	1.36969e-18
TYMS	turquoise	0.843862	8.32885e-102	0.432571	2.38355e-18
UBE2C	turquoise	0.897976	1.30332e-133	0.417122	4.74485e-17
UBE2T	turquoise	0.892657	9.21503e-130	0.457119	1.48467e-20
UHRF1	turquoise	0.90695	1.29255e-140	0.509303	7.03476e-26
WDR76	turquoise	0.855947	9.61933e-108	0.506522	1.42749e-25
ZWINT	turquoise	0.928089	2.16298e-160	0.469442	9.89374e-22

## Sheet: Supplementary Table S6
Supplementary Table S6：The results of functional enrichment analysis of hub genes in the turquoise module.
Category	GO	Description	LogP	Enrichment	Z-score	Log(q-value)
GO Biological Processes	GO:0000278	mitotic cell cycle	-83	32	45	-79
GO Biological Processes	GO:1903047	mitotic cell cycle process	-80	36	45	-76
Reactome Gene Sets	R-HSA-1640170	Cell Cycle	-77	27	40	-73
Reactome Gene Sets	R-HSA-69278	Cell Cycle, Mitotic	-69	30	40	-65
GO Biological Processes	GO:0051301	cell division	-58	29	36	-54
GO Biological Processes	GO:0007059	chromosome segregation	-50	40	38	-47
Reactome Gene Sets	R-HSA-69620	Cell Cycle Checkpoints	-50	38	37	-46
GO Biological Processes	GO:0000280	nuclear division	-47	36	36	-44
GO Biological Processes	GO:0048285	organelle fission	-46	33	34	-42
GO Biological Processes	GO:0098813	nuclear chromosome segregation	-43	42	36	-39
GO Biological Processes	GO:0010564	regulation of cell cycle process	-41	18	26	-38
GO Biological Processes	GO:0000819	sister chromatid segregation	-39	56	38	-36
GO Biological Processes	GO:0140014	mitotic nuclear division	-38	48	35	-34
GO Biological Processes	GO:0000070	mitotic sister chromatid segregation	-36	61	38	-33
Reactome Gene Sets	R-HSA-68886	M Phase	-35	23	27	-32
Reactome Gene Sets	R-HSA-2500257	Resolution of Sister Chromatid Cohesion	-35	56	36	-32
Reactome Gene Sets	R-HSA-68877	Mitotic Prometaphase	-35	39	32	-32
Reactome Gene Sets	R-HSA-68882	Mitotic Anaphase	-33	34	30	-30
Reactome Gene Sets	R-HSA-2555396	Mitotic Metaphase and Anaphase	-33	34	29	-30
GO Biological Processes	GO:1902850	microtubule cytoskeleton organization involved in mitosis	-32	54	34	-29
Reactome Gene Sets	R-HSA-69618	Mitotic Spindle Checkpoint	-30	55	33	-27
Reactome Gene Sets	R-HSA-141424	Amplification of signal from the kinetochores	-30	62	35	-27
Reactome Gene Sets	R-HSA-141444	Amplification of signal from unattached kinetochores via a MAD2 inhibitory signal	-30	62	35	-27
GO Biological Processes	GO:0006259	DNA metabolic process	-29	14	21	-26
KEGG Pathway	hsa04110	Cell cycle	-29	49	32	-26
GO Biological Processes	GO:0033044	regulation of chromosome organization	-29	33	28	-26
Reactome Gene Sets	R-HSA-2467813	Separation of Sister Chromatids	-29	36	28	-26
GO Biological Processes	GO:0007052	mitotic spindle organization	-29	62	34	-26
GO Biological Processes	GO:0051983	regulation of chromosome segregation	-29	62	34	-26
Reactome Gene Sets	R-HSA-9648025	EML4 and NUDC in mitotic spindle formation	-28	51	31	-25
GO Biological Processes	GO:0007346	regulation of mitotic cell cycle	-28	18	22	-25
GO Biological Processes	GO:0007051	spindle organization	-27	41	29	-25
WikiPathways	WP2446	Retinoblastoma gene in cancer	-27	61	33	-24
GO Biological Processes	GO:0051783	regulation of nuclear division	-27	43	29	-24
GO Biological Processes	GO:0033045	regulation of sister chromatid segregation	-27	70	34	-24
Reactome Gene Sets	R-HSA-5663220	RHO GTPases Activate Formins	-27	42	29	-24
WikiPathways	WP179	Cell cycle	-26	46	29	-23
GO Biological Processes	GO:0010965	regulation of mitotic sister chromatid separation	-25	73	34	-23
GO Biological Processes	GO:1901987	regulation of cell cycle phase transition	-25	19	21	-22
GO Biological Processes	GO:0007088	regulation of mitotic nuclear division	-25	48	29	-22
GO Biological Processes	GO:1905818	regulation of chromosome separation	-25	66	32	-22
GO Biological Processes	GO:0006974	cellular response to DNA damage stimulus	-24	13	18	-21
GO Biological Processes	GO:0000226	microtubule cytoskeleton organization	-24	15	19	-21
GO Biological Processes	GO:0006281	DNA repair	-24	16	20	-21
GO Biological Processes	GO:0071103	DNA conformation change	-24	22	21	-21
GO Biological Processes	GO:0006260	DNA replication	-24	30	24	-21
GO Biological Processes	GO:1901990	regulation of mitotic cell cycle phase transition	-23	21	21	-21
Canonical Pathways	M14	PID AURORA B PATHWAY	-23	99	36	-20
GO Biological Processes	GO:0030071	regulation of mitotic metaphase/anaphase transition	-22	69	31	-19
Reactome Gene Sets	R-HSA-195258	RHO GTPase Effectors	-22	20	20	-19
GO Biological Processes	GO:0045787	positive regulation of cell cycle	-22	20	20	-19
GO Biological Processes	GO:1902099	regulation of metaphase/anaphase transition of cell cycle	-21	66	30	-19
GO Biological Processes	GO:0090068	positive regulation of cell cycle process	-21	24	21	-19
Reactome Gene Sets	R-HSA-194315	Signaling by Rho GTPases	-20	11	16	-18
Reactome Gene Sets	R-HSA-9716542	Signaling by Rho GTPases, Miro GTPases and RHOBTB3	-20	11	16	-18
GO Biological Processes	GO:0007017	microtubule-based process	-20	10	15	-17
GO Biological Processes	GO:0140694	non-membrane-bounded organelle assembly	-19	19	19	-17
Canonical Pathways	M129	PID PLK1 PATHWAY	-19	77	30	-17
GO Biological Processes	GO:0033047	regulation of mitotic sister chromatid segregation	-19	77	30	-17
GO Biological Processes	GO:0000075	cell cycle checkpoint signaling	-19	33	22	-17
Reactome Gene Sets	R-HSA-453279	Mitotic G1 phase and G1/S transition	-19	32	22	-17
GO Biological Processes	GO:0010948	negative regulation of cell cycle process	-19	20	19	-16
GO Biological Processes	GO:0051321	meiotic cell cycle	-19	23	19	-16
Reactome Gene Sets	R-HSA-69242	S Phase	-19	29	21	-16
Reactome Gene Sets	R-HSA-69481	G2/M Checkpoints	-18	28	21	-16
GO Biological Processes	GO:0044770	cell cycle phase transition	-18	28	20	-16
Canonical Pathways	M176	PID FOXM1 PATHWAY	-18	81	30	-16
WikiPathways	WP4016	DNA IR-damage and cellular response via ATR	-18	48	24	-15
GO Biological Processes	GO:1901988	negative regulation of cell cycle phase transition	-18	22	19	-15
Reactome Gene Sets	R-HSA-69239	Synthesis of DNA	-17	35	22	-15
Reactome Gene Sets	R-HSA-69190	DNA strand elongation	-17	96	31	-15
GO Biological Processes	GO:0051383	kinetochore organization	-17	130	34	-15
GO Biological Processes	GO:0051225	spindle assembly	-17	41	23	-15
GO Biological Processes	GO:0044772	mitotic cell cycle phase transition	-17	27	20	-15
Reactome Gene Sets	R-HSA-69206	G1/S Transition	-17	32	21	-14
GO Biological Processes	GO:0006261	DNA-dependent DNA replication	-17	32	21	-14
GO Biological Processes	GO:0045786	negative regulation of cell cycle	-17	15	16	-14
Reactome Gene Sets	R-HSA-176187	Activation of ATR in response to replication stress	-17	82	28	-14
GO Biological Processes	GO:0033260	nuclear DNA replication	-16	110	31	-14
GO Biological Processes	GO:0044786	cell cycle DNA replication	-16	110	31	-14
Reactome Gene Sets	R-HSA-69306	DNA Replication	-16	23	18	-13
GO Biological Processes	GO:0007093	mitotic cell cycle checkpoint signaling	-16	33	20	-13
Reactome Gene Sets	R-HSA-156711	Polo-like kinase mediated events	-16	150	34	-13
WikiPathways	WP466	DNA replication	-16	71	26	-13
GO Biological Processes	GO:0034508	centromere complex assembly	-16	99	30	-13
GO Biological Processes	GO:0140013	meiotic nuclear division	-16	26	18	-13
GO Biological Processes	GO:2000816	negative regulation of mitotic sister chromatid separation	-15	92	29	-13
GO Biological Processes	GO:0033046	negative regulation of sister chromatid segregation	-15	92	29	-13
GO Biological Processes	GO:0033048	negative regulation of mitotic sister chromatid segregation	-15	92	29	-13
GO Biological Processes	GO:0090307	mitotic spindle assembly	-15	63	25	-13
GO Biological Processes	GO:1905819	negative regulation of chromosome separation	-15	86	28	-13
GO Biological Processes	GO:0051985	negative regulation of chromosome segregation	-15	86	28	-13
GO Biological Processes	GO:0006323	DNA packaging	-15	20	17	-13
GO Biological Processes	GO:1903046	meiotic cell cycle process	-15	24	17	-13
Reactome Gene Sets	R-HSA-176974	Unwinding of DNA	-15	190	36	-13
GO Biological Processes	GO:2001251	negative regulation of chromosome organization	-15	43	21	-12
GO Biological Processes	GO:0045839	negative regulation of mitotic nuclear division	-15	78	26	-12
GO Biological Processes	GO:0065004	protein-DNA complex assembly	-15	22	17	-12
GO Biological Processes	GO:1902969	mitotic DNA replication	-14	170	35	-12
KEGG Pathway	hsa03030	DNA replication	-14	74	26	-12
GO Biological Processes	GO:0006268	DNA unwinding involved in DNA replication	-14	110	29	-12
GO Biological Processes	GO:0044839	cell cycle G2/M phase transition	-14	52	22	-12
Reactome Gene Sets	R-HSA-453274	Mitotic G2-G2/M phases	-14	21	16	-12
Canonical Pathways	M46	PID ATR PATHWAY	-14	68	24	-12
GO Biological Processes	GO:0071173	spindle assembly checkpoint signaling	-14	99	28	-12
GO Biological Processes	GO:0007094	mitotic spindle assembly checkpoint signaling	-14	99	28	-12
GO Biological Processes	GO:0071174	mitotic spindle checkpoint signaling	-14	99	28	-12
Reactome Gene Sets	R-HSA-174143	APC/C-mediated degradation of cell cycle proteins	-14	37	20	-12
Reactome Gene Sets	R-HSA-453276	Regulation of mitotic cell cycle	-14	37	20	-12
GO Biological Processes	GO:0051784	negative regulation of nuclear division	-14	65	24	-12
Reactome Gene Sets	R-HSA-69273	Cyclin A/B1/B2 associated events during G2/M transition	-14	95	27	-12
GO Biological Processes	GO:0031577	spindle checkpoint signaling	-14	95	27	-12
GO Biological Processes	GO:0045841	negative regulation of mitotic metaphase/anaphase transition	-14	91	27	-11
GO Biological Processes	GO:1901991	negative regulation of mitotic cell cycle phase transition	-14	23	16	-11
GO Biological Processes	GO:0000281	mitotic cytokinesis	-14	45	21	-11
GO Biological Processes	GO:0061640	cytoskeleton-dependent cytokinesis	-14	34	19	-11
GO Biological Processes	GO:0045930	negative regulation of mitotic cell cycle	-14	19	16	-11
GO Biological Processes	GO:0006310	DNA recombination	-14	19	15	-11
GO Biological Processes	GO:0000910	cytokinesis	-14	34	19	-11
GO Biological Processes	GO:1902100	negative regulation of metaphase/anaphase transition of cell cycle	-13	85	26	-11
Reactome Gene Sets	R-HSA-73886	Chromosome Maintenance	-13	25	17	-11
GO Biological Processes	GO:0051303	establishment of chromosome localization	-13	39	19	-11
GO Biological Processes	GO:0071824	protein-DNA complex subunit organization	-13	17	15	-11
Reactome Gene Sets	R-HSA-176814	Activation of APC/C and APC/C:Cdc20 mediated degradation of mitotic proteins	-13	38	19	-11
GO Biological Processes	GO:0050000	chromosome localization	-13	38	19	-11
GO Biological Processes	GO:0006302	double-strand break repair	-13	20	15	-11
Reactome Gene Sets	R-HSA-68962	Activation of the pre-replicative complex	-13	74	24	-11
Reactome Gene Sets	R-HSA-69275	G2/M Transition	-13	20	15	-11
GO Biological Processes	GO:1901989	positive regulation of cell cycle phase transition	-12	26	16	-10
GO Biological Processes	GO:0051310	metaphase plate congression	-12	45	20	-10
WikiPathways	WP45	G1 to S cell cycle control	-12	42	19	-9.8
GO Biological Processes	GO:0070925	organelle assembly	-12	7.8	11	-9.8
GO Biological Processes	GO:0000727	double-strand break repair via break-induced replication	-12	150	30	-9.7
GO Biological Processes	GO:1901992	positive regulation of mitotic cell cycle phase transition	-12	30	17	-9.6
GO Biological Processes	GO:0030261	chromosome condensation	-12	55	21	-9.6
GO Biological Processes	GO:0000724	double-strand break repair via homologous recombination	-12	29	16	-9.4
CORUM	CORUM:387	MCM complex	-12	250	35	-9.4
GO Biological Processes	GO:0000725	recombinational repair	-12	28	16	-9.4
Reactome Gene Sets	R-HSA-69205	G1/S-Specific Transcription	-11	74	23	-9.1
Reactome Gene Sets	R-HSA-176409	APC/C:Cdc20 mediated degradation of mitotic proteins	-11	35	17	-9.1
GO Biological Processes	GO:0007080	mitotic metaphase plate congression	-11	48	19	-9.1
GO Biological Processes	GO:0006270	DNA replication initiation	-11	71	22	-9
WikiPathways	WP2361	Gastric cancer network 1	-11	71	22	-9
GO Biological Processes	GO:0051382	kinetochore assembly	-11	120	26	-9
GO Biological Processes	GO:0010639	negative regulation of organelle organization	-11	12	12	-8.9
Reactome Gene Sets	R-HSA-73894	DNA Repair	-11	12	12	-8.9
GO Biological Processes	GO:0000086	G2/M transition of mitotic cell cycle	-11	45	19	-8.8
GO Biological Processes	GO:0051656	establishment of organelle localization	-11	12	12	-8.8
GO Biological Processes	GO:0032508	DNA duplex unwinding	-11	31	16	-8.6
GO Biological Processes	GO:0045931	positive regulation of mitotic cell cycle	-11	23	15	-8.5
GO Biological Processes	GO:0051256	mitotic spindle midzone assembly	-11	190	30	-8.5
GO Biological Processes	GO:0000022	mitotic spindle elongation	-11	190	30	-8.5
Reactome Gene Sets	R-HSA-69052	Switching of origins to a post-replicative state	-11	30	16	-8.5
Reactome Gene Sets	R-HSA-3700989	Transcriptional Regulation by TP53	-11	11	12	-8.4
KEGG Pathway	hsa04114	Oocyte meiosis	-11	23	14	-8.4
GO Biological Processes	GO:0032392	DNA geometric change	-11	29	16	-8.4
GO Biological Processes	GO:0045132	meiotic chromosome segregation	-11	29	16	-8.4
CORUM	CORUM:929	CEN complex	-10	56	19	-8.3
GO Biological Processes	GO:0010389	regulation of G2/M transition of mitotic cell cycle	-10	27	15	-8.2
GO Biological Processes	GO:0000079	regulation of cyclin-dependent protein serine/threonine kinase activity	-10	27	15	-8.2
GO Biological Processes	GO:0051231	spindle elongation	-10	160	29	-8.2
GO Biological Processes	GO:0051640	organelle localization	-10	9.5	11	-8.1
GO Biological Processes	GO:1904029	regulation of cyclin-dependent protein kinase activity	-10	26	15	-8.1
KEGG Pathway	hsa04914	Progesterone-mediated oocyte maturation	-10	26	15	-8
WikiPathways	WP707	DNA damage response	-10	34	16	-7.9
Reactome Gene Sets	R-HSA-68949	Orc1 removal from chromatin	-10	34	16	-7.9
GO Biological Processes	GO:1902749	regulation of cell cycle G2/M phase transition	-9.9	25	14	-7.8
Canonical Pathways	M40	PID E2F PATHWAY	-9.8	32	16	-7.7
GO Biological Processes	GO:0031570	DNA integrity checkpoint signaling	-9.8	24	14	-7.7
Reactome Gene Sets	R-HSA-774815	Nucleosome assembly	-9.8	32	16	-7.7
Reactome Gene Sets	R-HSA-606279	Deposition of new CENPA-containing nucleosomes at the centromere	-9.8	32	16	-7.7
Reactome Gene Sets	R-HSA-2514853	Condensation of Prometaphase Chromosomes	-9.7	130	26	-7.6
GO Biological Processes	GO:0008608	attachment of spindle microtubules to kinetochore	-9.7	71	20	-7.6
Reactome Gene Sets	R-HSA-5693532	DNA Double-Strand Break Repair	-9.6	18	13	-7.4
GO Biological Processes	GO:0051255	spindle midzone assembly	-9.5	120	25	-7.4
Reactome Gene Sets	R-HSA-176408	Regulation of APC/C activators between G1/S and early anaphase	-9.5	29	15	-7.4
Reactome Gene Sets	R-HSA-1538133	G0 and Early G1	-9.4	66	20	-7.4
GO Biological Processes	GO:0007127	meiosis I	-9.4	21	13	-7.3
GO Biological Processes	GO:0061982	meiosis I cell cycle process	-9.3	21	13	-7.2
GO Biological Processes	GO:0051988	regulation of attachment of spindle microtubules to kinetochore	-9.3	110	24	-7.2
Reactome Gene Sets	R-HSA-69478	G2/M DNA replication checkpoint	-9.2	240	31	-7.1
GO Biological Processes	GO:0032465	regulation of cytokinesis	-9.1	26	14	-7
Canonical Pathways	M242	PID AURORA A PATHWAY	-9.1	57	18	-7
WikiPathways	WP1530	miRNA regulation of DNA damage response	-9	25	14	-6.9
Reactome Gene Sets	R-HSA-5693538	Homology Directed Repair	-9	19	13	-6.9
GO Biological Processes	GO:0007143	female meiotic nuclear division	-8.9	54	18	-6.8
WikiPathways	WP4240	Regulation of sister chromatid separation at the metaphase-anaphase transition	-8.8	93	21	-6.7
Reactome Gene Sets	R-HSA-176417	Phosphorylation of Emi1	-8.7	200	28	-6.7
Reactome Gene Sets	R-HSA-69002	DNA Replication Pre-Initiation	-8.7	18	12	-6.7
GO Biological Processes	GO:0007076	mitotic chromosome condensation	-8.6	87	21	-6.6
Reactome Gene Sets	R-HSA-5685942	HDR through Homologous Recombination (HRR)	-8.5	31	14	-6.5
Reactome Gene Sets	R-HSA-2980767	Activation of NIMA Kinases NEK9, NEK6, NEK7	-8.4	170	26	-6.3
WikiPathways	WP2516	ATM signaling pathway	-8.4	44	16	-6.3
Reactome Gene Sets	R-HSA-5693579	Homologous DNA Pairing and Strand Exchange	-8.2	42	16	-6.2
Reactome Gene Sets	R-HSA-179419	APC:Cdc20 mediated degradation of cell cycle proteins prior to satisfation of the cell cycle checkpoint	-8.2	28	14	-6.2
WikiPathways	WP4946	DNA repair pathways, full network	-8.1	20	12	-6
Canonical Pathways	M19	PID P73PATHWAY	-8	26	13	-6
GO Biological Processes	GO:0008283	cell population proliferation	-7.9	7.9	8.9	-5.9
GO Biological Processes	GO:0051052	regulation of DNA metabolic process	-7.9	8.8	9.2	-5.8
GO Biological Processes	GO:0051302	regulation of cell division	-7.8	14	11	-5.8
Reactome Gene Sets	R-HSA-68867	Assembly of the pre-replicative complex	-7.8	18	11	-5.8
Reactome Gene Sets	R-HSA-5693567	HDR through Homologous Recombination (HRR) or Single Strand Annealing (SSA)	-7.8	18	11	-5.7
Reactome Gene Sets	R-HSA-179409	APC-Cdc20 mediated degradation of Nek2A	-7.6	57	17	-5.6
Reactome Gene Sets	R-HSA-6804756	Regulation of TP53 Activity through Phosphorylation	-7.6	23	12	-5.5
GO Biological Processes	GO:0051653	spindle localization	-7.5	32	14	-5.5
WikiPathways	WP3959	DNA IR-double strand breaks and cellular response via ATM	-7.5	32	14	-5.5
Reactome Gene Sets	R-HSA-69473	G2/M DNA damage checkpoint	-7.5	22	12	-5.4
CORUM	CORUM:7439	ECT2-KIF23-RACGAP1 complex	-7.4	300	30	-5.4
CORUM	CORUM:2582	Chromosomal passenger complex CPC (CDCA8, AURKB, BIRC5)	-7.4	300	30	-5.4
GO Biological Processes	GO:0031055	chromatin remodeling at centromere	-7.4	110	21	-5.4
CORUM	CORUM:7394	CENP-H-I complex	-7.4	110	21	-5.4
Reactome Gene Sets	R-HSA-983189	Kinesins	-7.3	30	13	-5.3
GO Biological Processes	GO:0051347	positive regulation of transferase activity	-7.3	6.9	8.2	-5.3
GO Biological Processes	GO:0051315	attachment of mitotic spindle microtubules to kinetochore	-7.2	99	20	-5.2
CORUM	CORUM:1179	CENP-A NAC-CAD complex	-7.2	99	20	-5.2
KEGG Pathway	hsa04218	Cellular senescence	-7.2	15	10	-5.2
GO Biological Processes	GO:0010972	negative regulation of G2/M transition of mitotic cell cycle	-7.2	29	13	-5.2
Reactome Gene Sets	R-HSA-5633007	Regulation of TP53 Activity	-7.1	15	10	-5.1
GO Biological Processes	GO:0051129	negative regulation of cellular component organization	-7.1	6.1	7.8	-5.1
GO Biological Processes	GO:1902750	negative regulation of cell cycle G2/M phase transition	-7.1	28	12	-5.1
Reactome Gene Sets	R-HSA-75035	Chk1/Chk2(Cds1) mediated inactivation of Cyclin B:Cdk1 complex	-7.1	91	19	-5.1
CORUM	CORUM:1005	RC complex during G2/M-phase of cell cycle	-7.1	91	19	-5.1
WikiPathways	WP2363	Gastric cancer network 2	-7.1	45	15	-5.1
GO Biological Processes	GO:1901976	regulation of cell cycle checkpoint	-7	44	14	-5
WikiPathways	WP5117	Cohesin complex - Cornelia de Lange syndrome	-6.9	42	14	-4.9
Reactome Gene Sets	R-HSA-8953750	Transcriptional Regulation by E2F6	-6.9	42	14	-4.9
GO Biological Processes	GO:0040001	establishment of mitotic spindle localization	-6.9	42	14	-4.9
CORUM	CORUM:7388	CENP-A nucleosomal complex	-6.9	85	18	-4.9
CORUM	CORUM:5611	Emerin complex 24	-6.9	85	18	-4.9
Reactome Gene Sets	R-HSA-162658	Golgi Cisternae Pericentriolar Stack Reorganization	-6.9	85	18	-4.9
GO Biological Processes	GO:0051984	positive regulation of chromosome segregation	-6.9	85	18	-4.9
CORUM	CORUM:127	NDC80 kinetochore complex	-6.8	220	26	-4.9
CORUM	CORUM:1119	Chromosomal passenger complex CPC (INCENP, CDCA8, BIRC5, AURKB)	-6.8	220	26	-4.9
CORUM	CORUM:1118	Chromosomal passenger complex CPC (INCENP, CDCA8, BIRC5, AURKB)	-6.8	220	26	-4.9
CORUM	CORUM:2792	MCM2-MCM4-MCM6-MCM7 complex	-6.8	220	26	-4.9
CORUM	CORUM:190	Mitotic checkpoint complex (MCC)	-6.8	220	26	-4.9
GO Biological Processes	GO:0006271	DNA strand elongation involved in DNA replication	-6.8	79	18	-4.8
GO Biological Processes	GO:0070192	chromosome organization involved in meiotic cell cycle	-6.8	25	12	-4.8
Reactome Gene Sets	R-HSA-174184	Cdc20:Phospho-APC/C mediated degradation of Cyclin A	-6.7	24	12	-4.8
Reactome Gene Sets	R-HSA-5693616	Presynaptic phase of homologous DNA pairing and strand exchange	-6.7	38	13	-4.7
Reactome Gene Sets	R-HSA-1362300	Transcription of E2F targets under negative control by p107 (RBL1) and p130 (RBL2) in complex with HDAC1	-6.7	74	17	-4.7
GO Biological Processes	GO:0045859	regulation of protein kinase activity	-6.6	6	7.4	-4.6
GO Biological Processes	GO:1903504	regulation of mitotic spindle checkpoint	-6.6	70	16	-4.6
GO Biological Processes	GO:0090231	regulation of spindle checkpoint	-6.6	70	16	-4.6
GO Biological Processes	GO:0090266	regulation of mitotic cell cycle spindle assembly checkpoint	-6.6	70	16	-4.6
GO Biological Processes	GO:0032467	positive regulation of cytokinesis	-6.5	35	13	-4.6
GO Biological Processes	GO:0042770	signal transduction in response to DNA damage	-6.4	16	9.8	-4.5
GO Biological Processes	GO:1902975	mitotic DNA replication initiation	-6.4	180	23	-4.5
GO Biological Processes	GO:1902315	nuclear cell cycle DNA replication initiation	-6.4	180	23	-4.5
GO Biological Processes	GO:1902292	cell cycle DNA replication initiation	-6.4	180	23	-4.5
GO Biological Processes	GO:0044774	mitotic DNA integrity checkpoint signaling	-6.4	21	11	-4.5
Reactome Gene Sets	R-HSA-2995383	Initiation of Nuclear Envelope (NE) Reformation	-6.3	62	16	-4.4
Canonical Pathways	M1	PID FANCONI PATHWAY	-6.3	32	12	-4.3
GO Biological Processes	GO:0071900	regulation of protein serine/threonine kinase activity	-6.3	8	7.9	-4.3
Reactome Gene Sets	R-HSA-176412	Phosphorylation of the APC/C	-6.2	59	15	-4.3
GO Biological Processes	GO:0022616	DNA strand elongation	-6.2	59	15	-4.3
Reactome Gene Sets	R-HSA-6791312	TP53 Regulates Transcription of Cell Cycle Genes	-6.2	31	12	-4.3
GO Biological Processes	GO:0044818	mitotic G2/M transition checkpoint	-6.2	31	12	-4.3
GO Biological Processes	GO:2001252	positive regulation of chromosome organization	-6.2	20	10	-4.3
GO Biological Processes	GO:0007062	sister chromatid cohesion	-6.2	30	12	-4.2
GO Biological Processes	GO:0006468	protein phosphorylation	-6.2	5.5	7	-4.2
Reactome Gene Sets	R-HSA-141430	Inactivation of APC/C via direct inhibition of the APC/C complex	-6.2	56	15	-4.2
Reactome Gene Sets	R-HSA-141405	Inhibition of the proteolytic activity of APC/C required for the onset of anaphase by mitotic spindle checkpoint components	-6.2	56	15	-4.2
CORUM	CORUM:310	Cell cycle kinase complex CDC2	-6.1	150	21	-4.2
GO Biological Processes	GO:0051293	establishment of spindle localization	-6.1	30	12	-4.2
GO Biological Processes	GO:0007292	female gamete generation	-6.1	14	9.2	-4.2
GO Biological Processes	GO:0051445	regulation of meiotic cell cycle	-6.1	29	12	-4.2
KEGG Pathway	hsa05166	Human T-cell leukemia virus 1 infection	-6	11	8.4	-4.1
Reactome Gene Sets	R-HSA-2980766	Nuclear Envelope Breakdown	-6	28	12	-4.1
GO Biological Processes	GO:0007276	gamete generation	-6	5.3	6.8	-4.1
KEGG Pathway	hsa03460	Fanconi anemia pathway	-6	27	11	-4
Reactome Gene Sets	R-HSA-6811434	COPI-dependent Golgi-to-ER retrograde traffic	-6	18	9.8	-4
Reactome Gene Sets	R-HSA-9701193	Defective HDR through Homologous Recombination (HRR) due to PALB2 loss of function	-5.9	49	14	-4
GO Biological Processes	GO:1904666	regulation of ubiquitin protein ligase activity	-5.9	49	14	-4
Reactome Gene Sets	R-HSA-9701192	Defective HDR through Homologous Recombination (HRR) due to BRCA1 loss-of-function	-5.9	49	14	-4
Reactome Gene Sets	R-HSA-9704646	Defective HDR through Homologous Recombination Repair (HRR) due to PALB2 loss of BRCA2/RAD51/RAD51C binding function	-5.9	49	14	-4
Reactome Gene Sets	R-HSA-9704331	Defective HDR through Homologous Recombination Repair (HRR) due to PALB2 loss of BRCA1 binding function	-5.9	49	14	-4
Reactome Gene Sets	R-HSA-174048	APC/C:Cdc20 mediated degradation of Cyclin B	-5.9	49	14	-4
Reactome Gene Sets	R-HSA-9675136	Diseases of DNA Double-Strand Break Repair	-5.9	49	14	-4
GO Biological Processes	GO:0061641	CENP-A containing chromatin organization	-5.9	130	19	-4
GO Biological Processes	GO:0034080	CENP-A containing chromatin assembly	-5.9	130	19	-4
GO Biological Processes	GO:0051438	regulation of ubiquitin-protein transferase activity	-5.9	26	11	-4
GO Biological Processes	GO:0000077	DNA damage checkpoint signaling	-5.9	17	9.6	-4
Reactome Gene Sets	R-HSA-5693554	Resolution of D-loop Structures through Synthesis-Dependent Strand Annealing (SDSA)	-5.8	46	13	-3.9
GO Biological Processes	GO:0043549	regulation of kinase activity	-5.7	5	6.6	-3.8
GO Biological Processes	GO:0001824	blastocyst development	-5.7	16	9.4	-3.8
GO Biological Processes	GO:2000779	regulation of double-strand break repair	-5.7	16	9.3	-3.8
GO Biological Processes	GO:0090306	meiotic spindle assembly	-5.7	110	18	-3.8
GO Biological Processes	GO:0009314	response to radiation	-5.7	6.9	7.1	-3.8
GO Biological Processes	GO:0031497	chromatin assembly	-5.6	12	8.4	-3.8
GO Biological Processes	GO:0010971	positive regulation of G2/M transition of mitotic cell cycle	-5.6	42	13	-3.7
GO Biological Processes	GO:0071478	cellular response to radiation	-5.6	12	8.3	-3.7
GO Biological Processes	GO:0000132	establishment of mitotic spindle orientation	-5.5	39	12	-3.6
GO Biological Processes	GO:1902751	positive regulation of cell cycle G2/M phase transition	-5.4	38	12	-3.6
GO Biological Processes	GO:0034502	protein localization to chromosome	-5.4	21	9.9	-3.5
GO Biological Processes	GO:0010569	regulation of double-strand break repair via homologous recombination	-5.4	21	9.8	-3.5
GO Biological Processes	GO:0006333	chromatin assembly or disassembly	-5.3	11	7.9	-3.5
GO Biological Processes	GO:0016572	histone phosphorylation	-5.3	36	12	-3.5
Reactome Gene Sets	R-HSA-5693568	Resolution of D-loop Structures through Holliday Junction Intermediates	-5.3	36	12	-3.5
GO Biological Processes	GO:0006336	DNA replication-independent chromatin assembly	-5.3	36	12	-3.5
Reactome Gene Sets	R-HSA-8854518	AURKA Activation by TPX2	-5.3	20	9.6	-3.4
KEGG Pathway	hsa04115	p53 signaling pathway	-5.3	20	9.6	-3.4
Reactome Gene Sets	R-HSA-5693537	Resolution of D-Loop Structures	-5.3	35	11	-3.4
Reactome Gene Sets	R-HSA-9675135	Diseases of DNA repair	-5.3	35	11	-3.4
GO Biological Processes	GO:0034724	DNA replication-independent chromatin organization	-5.3	35	11	-3.4
Reactome Gene Sets	R-HSA-174178	APC/C:Cdh1 mediated degradation of Cdc20 and other APC/C:Cdh1 targeted proteins in late mitosis/early G1	-5.3	20	9.5	-3.4
GO Biological Processes	GO:0000018	regulation of DNA recombination	-5.2	14	8.4	-3.4
GO Biological Processes	GO:0006275	regulation of DNA replication	-5.2	14	8.4	-3.4
GO Biological Processes	GO:0007095	mitotic G2 DNA damage checkpoint signaling	-5.2	34	11	-3.4
GO Biological Processes	GO:1904668	positive regulation of ubiquitin protein ligase activity	-5.2	81	15	-3.4
Reactome Gene Sets	R-HSA-8856688	Golgi-to-ER retrograde transport	-5.2	13	8.3	-3.4
GO Biological Processes	GO:0032506	cytokinetic process	-5.2	33	11	-3.3
GO Biological Processes	GO:0051294	establishment of spindle orientation	-5.2	33	11	-3.3
GO Biological Processes	GO:0044773	mitotic DNA damage checkpoint signaling	-5.1	19	9.2	-3.3
Reactome Gene Sets	R-HSA-5685938	HDR through Single Strand Annealing (SSA)	-5.1	32	11	-3.3
Reactome Gene Sets	R-HSA-68875	Mitotic Prophase	-5	13	8	-3.2
GO Biological Processes	GO:0007144	female meiosis I	-5	68	14	-3.1
GO Biological Processes	GO:0001833	inner cell mass cell proliferation	-5	68	14	-3.1
Reactome Gene Sets	R-HSA-68884	Mitotic Telophase/Cytokinesis	-5	68	14	-3.1
GO Biological Processes	GO:0009411	response to UV	-5	12	7.9	-3.1
Reactome Gene Sets	R-HSA-2565942	Regulation of PLK1 Activity at G2/M Transition	-4.9	17	8.7	-3.1
GO Biological Processes	GO:0051781	positive regulation of cell division	-4.9	17	8.6	-3
GO Biological Processes	GO:0006282	regulation of DNA repair	-4.9	12	7.7	-3
GO Biological Processes	GO:0070507	regulation of microtubule cytoskeleton organization	-4.9	12	7.7	-3
GO Biological Processes	GO:0051054	positive regulation of DNA metabolic process	-4.9	9	7.1	-3
Reactome Gene Sets	R-HSA-4615885	SUMOylation of DNA replication proteins	-4.8	26	9.9	-3
GO Biological Processes	GO:0000212	meiotic spindle organization	-4.8	59	13	-3
Reactome Gene Sets	R-HSA-4419969	Depolymerisation of the Nuclear Lamina	-4.8	59	13	-3
WikiPathways	WP1971	Integrated cancer pathway	-4.7	26	9.8	-2.9
WikiPathways	WP3878	ATM signaling in development and disease	-4.7	26	9.8	-2.9
GO Biological Processes	GO:2001020	regulation of response to DNA damage stimulus	-4.7	8.4	6.8	-2.9
Reactome Gene Sets	R-HSA-5693607	Processing of DNA double-strand break ends	-4.7	15	8.1	-2.9
GO Biological Processes	GO:0048146	positive regulation of fibroblast proliferation	-4.7	25	9.6	-2.8
WikiPathways	WP2038	Microtubule cytoskeleton regulation	-4.6	24	9.5	-2.8
Reactome Gene Sets	R-HSA-983231	Factors involved in megakaryocyte development and platelet production	-4.6	11	7.2	-2.8
GO Biological Processes	GO:0006325	chromatin organization	-4.6	5.2	5.9	-2.8
GO Biological Processes	GO:0000076	DNA replication checkpoint signaling	-4.6	52	12	-2.8
Reactome Gene Sets	R-HSA-180786	Extension of Telomeres	-4.6	23	9.2	-2.8
GO Biological Processes	GO:0007096	regulation of exit from mitosis	-4.5	49	12	-2.7
Reactome Gene Sets	R-HSA-6804114	TP53 Regulates Transcription of Genes Involved in G2 Cell Cycle Arrest	-4.5	49	12	-2.7
Reactome Gene Sets	R-HSA-1362277	Transcription of E2F targets under negative control by DREAM complex	-4.5	47	12	-2.6
GO Biological Processes	GO:0140527	reciprocal homologous recombination	-4.4	22	8.9	-2.6
GO Biological Processes	GO:0007131	reciprocal meiotic recombination	-4.4	22	8.9	-2.6
Reactome Gene Sets	R-HSA-69186	Lagging Strand Synthesis	-4.4	44	11	-2.6
GO Biological Processes	GO:0001832	blastocyst growth	-4.4	44	11	-2.6
GO Biological Processes	GO:0010638	positive regulation of organelle organization	-4.4	5.5	5.8	-2.6
GO Biological Processes	GO:0035825	homologous recombination	-4.4	21	8.7	-2.6
GO Biological Processes	GO:0001701	in utero embryonic development	-4.3	6.2	6	-2.5
Reactome Gene Sets	R-HSA-113510	E2F mediated regulation of DNA replication	-4.3	42	11	-2.5
GO Biological Processes	GO:0007063	regulation of sister chromatid cohesion	-4.3	42	11	-2.5
Reactome Gene Sets	R-HSA-5651801	PCNA-Dependent Long Patch Base Excision Repair	-4.3	42	11	-2.5
GO Biological Processes	GO:0071459	protein localization to chromosome, centromeric region	-4.3	42	11	-2.5
GO Biological Processes	GO:0051785	positive regulation of nuclear division	-4.3	20	8.5	-2.5
GO Biological Processes	GO:2000278	regulation of DNA biosynthetic process	-4.3	12	7.3	-2.5
GO Biological Processes	GO:0051444	negative regulation of ubiquitin-protein transferase activity	-4.3	40	11	-2.5
GO Biological Processes	GO:0043486	histone exchange	-4.3	40	11	-2.5
Reactome Gene Sets	R-HSA-2132295	MHC class II antigen presentation	-4.2	12	7.1	-2.4
KEGG Pathway	hsa03430	Mismatch repair	-4.2	39	11	-2.4
WikiPathways	WP531	DNA mismatch repair	-4.2	39	11	-2.4
Reactome Gene Sets	R-HSA-6811442	Intra-Golgi and retrograde Golgi-to-ER traffic	-4.2	8.8	6.5	-2.4
GO Biological Processes	GO:0006334	nucleosome assembly	-4.2	12	7.1	-2.4
GO Biological Processes	GO:0045143	homologous chromosome segregation	-4.2	18	8.1	-2.4
GO Biological Processes	GO:0031100	animal organ regeneration	-4.2	18	8.1	-2.4
GO Biological Processes	GO:0104004	cellular response to environmental stimulus	-4.1	6.8	5.9	-2.3
GO Biological Processes	GO:0071214	cellular response to abiotic stimulus	-4.1	6.8	5.9	-2.3
GO Biological Processes	GO:0031396	regulation of protein ubiquitination	-4.1	8.3	6.3	-2.3
Reactome Gene Sets	R-HSA-110373	Resolution of AP sites via the multiple-nucleotide patch replacement pathway	-4	34	9.8	-2.3
GO Biological Processes	GO:2000573	positive regulation of DNA biosynthetic process	-4	16	7.6	-2.2
Reactome Gene Sets	R-HSA-2299718	Condensation of Prophase Chromosomes	-3.9	16	7.5	-2.2
Reactome Gene Sets	R-HSA-2995410	Nuclear Envelope (NE) Reassembly	-3.9	16	7.5	-2.1
Reactome Gene Sets	R-HSA-8852276	The role of GTSE1 in G2/M progression after G2 checkpoint	-3.9	15	7.4	-2.1
Reactome Gene Sets	R-HSA-110314	Recognition of DNA damage by PCNA-containing replication complex	-3.8	30	9.1	-2.1
GO Biological Processes	GO:0048145	regulation of fibroblast proliferation	-3.8	15	7.3	-2
GO Biological Processes	GO:0045737	positive regulation of cyclin-dependent protein serine/threonine kinase activity	-3.8	29	9	-2
GO Biological Processes	GO:0040020	regulation of meiotic nuclear division	-3.8	28	8.8	-2
GO Biological Processes	GO:0051642	centrosome localization	-3.8	28	8.8	-2
GO Biological Processes	GO:0051443	positive regulation of ubiquitin-protein transferase activity	-3.8	28	8.8	-2
GO Biological Processes	GO:0036297	interstrand cross-link repair	-3.8	28	8.8	-2
GO Biological Processes	GO:0061842	microtubule organizing center localization	-3.7	27	8.7	-2
GO Biological Processes	GO:1903320	regulation of protein modification by small protein conjugation or removal	-3.7	7.2	5.7	-2
GO Biological Processes	GO:0032886	regulation of microtubule-based process	-3.7	7.1	5.7	-1.9
Reactome Gene Sets	R-HSA-174417	Telomere C-strand (Lagging Strand) Synthesis	-3.7	26	8.5	-1.9
GO Biological Processes	GO:0007098	centrosome cycle	-3.7	14	6.9	-1.9
Reactome Gene Sets	R-HSA-3301854	Nuclear Pore Complex (NPC) Disassembly	-3.6	25	8.4	-1.9
GO Biological Processes	GO:1904031	positive regulation of cyclin-dependent protein kinase activity	-3.6	25	8.4	-1.9
GO Biological Processes	GO:0034644	cellular response to UV	-3.6	13	6.8	-1.9
GO Biological Processes	GO:0031110	regulation of microtubule polymerization or depolymerization	-3.6	13	6.8	-1.9
GO Biological Processes	GO:0071312	cellular response to alkaloid	-3.6	25	8.3	-1.9
GO Biological Processes	GO:0051098	regulation of binding	-3.6	5.7	5.2	-1.8
GO Biological Processes	GO:0071897	DNA biosynthetic process	-3.6	13	6.7	-1.8
GO Biological Processes	GO:0006338	chromatin remodeling	-3.5	6.7	5.4	-1.8
Reactome Gene Sets	R-HSA-73933	Resolution of Abasic Sites (AP sites)	-3.5	23	7.9	-1.8
GO Biological Processes	GO:0060236	regulation of mitotic spindle organization	-3.5	23	7.9	-1.8
GO Biological Processes	GO:2000241	regulation of reproductive process	-3.5	8.4	5.7	-1.7
Reactome Gene Sets	R-HSA-6783310	Fanconi Anemia Pathway	-3.5	22	7.8	-1.7
GO Biological Processes	GO:0034728	nucleosome organization	-3.5	8.4	5.7	-1.7
GO Biological Processes	GO:0022412	cellular process involved in reproduction in multicellular organism	-3.4	5.3	5	-1.7
GO Biological Processes	GO:0031023	microtubule organizing center organization	-3.4	12	6.3	-1.7
GO Biological Processes	GO:0090224	regulation of spindle organization	-3.4	21	7.5	-1.6
GO Biological Processes	GO:0045840	positive regulation of mitotic nuclear division	-3.3	20	7.4	-1.6
GO Biological Processes	GO:0032200	telomere organization	-3.3	11	6	-1.5
Canonical Pathways	M236	PID DELTA NP63 PATHWAY	-3.3	19	7.2	-1.5
GO Biological Processes	GO:0007163	establishment or maintenance of cell polarity	-3.3	7.6	5.4	-1.5
Reactome Gene Sets	R-HSA-2559583	Cellular Senescence	-3.3	7.5	5.3	-1.5
GO Biological Processes	GO:0098727	maintenance of cell number	-3.2	11	5.9	-1.5
GO Biological Processes	GO:0045005	DNA-dependent DNA replication maintenance of fidelity	-3.2	19	7.1	-1.5
Reactome Gene Sets	R-HSA-73893	DNA Damage Bypass	-3.2	19	7.1	-1.5
GO Biological Processes	GO:0009416	response to light stimulus	-3.2	5.8	4.9	-1.5
Reactome Gene Sets	R-HSA-157579	Telomere Maintenance	-3.2	10	5.9	-1.5
GO Biological Processes	GO:0071482	cellular response to light stimulus	-3.2	10	5.9	-1.5
KEGG Pathway	hsa05206	MicroRNAs in cancer	-3.2	5.7	4.9	-1.5
GO Biological Processes	GO:0090329	regulation of DNA-dependent DNA replication	-3.1	17	6.8	-1.4
GO Biological Processes	GO:0030010	establishment of cell polarity	-3.1	9.8	5.6	-1.4
GO Biological Processes	GO:0031398	positive regulation of protein ubiquitination	-3.1	9.8	5.6	-1.4
GO Biological Processes	GO:0051101	regulation of DNA binding	-3.1	9.8	5.6	-1.4
GO Biological Processes	GO:0031109	microtubule polymerization or depolymerization	-3.1	17	6.7	-1.4
KEGG Pathway	hsa05170	Human immunodeficiency virus 1 infection	-3.1	7	5.1	-1.4
GO Biological Processes	GO:0034599	cellular response to oxidative stress	-3.1	6.8	5	-1.3
WikiPathways	WP4352	Ciliary landscape	-3	6.8	5	-1.3
WikiPathways	WP5115	Network map of SARS-CoV-2 signaling pathway	-3	6.7	5	-1.3
GO Biological Processes	GO:0006997	nucleus organization	-2.9	8.7	5.2	-1.2
GO Biological Processes	GO:1903322	positive regulation of protein modification by small protein conjugation or removal	-2.9	8.5	5.2	-1.2
GO Biological Processes	GO:0043009	chordate embryonic development	-2.9	3.8	4.1	-1.2
GO Biological Processes	GO:0010212	response to ionizing radiation	-2.9	8.4	5.1	-1.2
GO Biological Processes	GO:0007018	microtubule-based movement	-2.9	5	4.4	-1.2
Reactome Gene Sets	R-HSA-6796648	TP53 Regulates Transcription of DNA Repair Genes	-2.9	14	6	-1.1
GO Biological Processes	GO:1902808	positive regulation of cell cycle G1/S phase transition	-2.8	13	5.9	-1.1
GO Biological Processes	GO:0070301	cellular response to hydrogen peroxide	-2.8	13	5.8	-1.1
Reactome Gene Sets	R-HSA-174154	APC/C:Cdc20 mediated degradation of Securin	-2.8	13	5.8	-1.1
GO Biological Processes	GO:0048589	developmental growth	-2.8	4.8	4.3	-1.1
GO Biological Processes	GO:0031099	regeneration	-2.8	8	5	-1.1
GO Biological Processes	GO:0009792	embryo development ending in birth or egg hatching	-2.8	3.6	4	-1.1
GO Biological Processes	GO:0040007	growth	-2.8	4.8	4.3	-1.1
WikiPathways	WP3303	RAC1/PAK1/p38/MMP2 pathway	-2.8	13	5.7	-1.1
GO Biological Processes	GO:0061351	neural precursor cell proliferation	-2.8	13	5.7	-1.1
Reactome Gene Sets	R-HSA-380259	Loss of Nlp from mitotic centrosomes	-2.8	13	5.7	-1.1
Reactome Gene Sets	R-HSA-9013026	RHOB GTPase cycle	-2.8	13	5.7	-1.1
Reactome Gene Sets	R-HSA-380284	Loss of proteins required for interphase microtubule organization from the centrosome	-2.8	13	5.7	-1.1
GO Biological Processes	GO:0006513	protein monoubiquitination	-2.7	12	5.6	-1
GO Biological Processes	GO:0062197	cellular response to chemical stress	-2.7	5.7	4.4	-1
WikiPathways	WP1984	Integrated breast cancer pathway	-2.7	7.6	4.8	-1
GO Biological Processes	GO:0071479	cellular response to ionizing radiation	-2.7	12	5.6	-1
Reactome Gene Sets	R-HSA-69017	CDK-mediated phosphorylation and removal of Cdc6	-2.7	12	5.6	-1
GO Biological Processes	GO:0016567	protein ubiquitination	-2.7	3.5	3.9	-1
GO Biological Processes	GO:0016570	histone modification	-2.7	4.6	4.2	-1
GO Biological Processes	GO:0051493	regulation of cytoskeleton organization	-2.7	3.9	4	-0.99
GO Biological Processes	GO:2000045	regulation of G1/S transition of mitotic cell cycle	-2.7	7.4	4.7	-0.97
GO Biological Processes	GO:0048511	rhythmic process	-2.7	5.5	4.3	-0.97
GO Biological Processes	GO:0045860	positive regulation of protein kinase activity	-2.7	4.5	4.1	-0.96
GO Biological Processes	GO:0051348	negative regulation of transferase activity	-2.6	5.5	4.3	-0.95
GO Biological Processes	GO:0080135	regulation of cellular response to stress	-2.6	3.4	3.8	-0.93
GO Biological Processes	GO:0000723	telomere maintenance	-2.6	11	5.3	-0.92
Reactome Gene Sets	R-HSA-380287	Centrosome maturation	-2.6	11	5.2	-0.88
GO Biological Processes	GO:0044843	cell cycle G1/S phase transition	-2.6	11	5.2	-0.88
Reactome Gene Sets	R-HSA-380270	Recruitment of mitotic centrosome proteins and complexes	-2.6	11	5.2	-0.88
GO Biological Processes	GO:0090502	RNA phosphodiester bond hydrolysis, endonucleolytic	-2.5	11	5.2	-0.86
GO Biological Processes	GO:1900182	positive regulation of protein localization to nucleus	-2.5	11	5.1	-0.85
GO Biological Processes	GO:0031397	negative regulation of protein ubiquitination	-2.5	11	5.1	-0.85
GO Biological Processes	GO:0022411	cellular component disassembly	-2.5	5.1	4.1	-0.84
GO Biological Processes	GO:0034654	nucleobase-containing compound biosynthetic process	-2.5	3.3	3.6	-0.84
GO Biological Processes	GO:0032446	protein modification by small protein conjugation	-2.5	3.3	3.6	-0.83
WikiPathways	WP4022	Pyrimidine metabolism	-2.5	10	5	-0.82
GO Biological Processes	GO:0007283	spermatogenesis	-2.5	3.6	3.7	-0.81
Reactome Gene Sets	R-HSA-3108232	SUMO E3 ligases SUMOylate target proteins	-2.5	6.5	4.3	-0.79
Reactome Gene Sets	R-HSA-73884	Base Excision Repair	-2.4	9.7	4.8	-0.74
GO Biological Processes	GO:0048232	male gamete generation	-2.4	3.5	3.6	-0.74
GO Biological Processes	GO:1902806	regulation of cell cycle G1/S phase transition	-2.4	6.3	4.2	-0.74
Reactome Gene Sets	R-HSA-2990846	SUMOylation	-2.4	6.3	4.2	-0.74
Reactome Gene Sets	R-HSA-380320	Recruitment of NuMA to mitotic centrosomes	-2.4	9.5	4.8	-0.72
WikiPathways	WP5087	Malignant pleural mesothelioma	-2.4	4	3.7	-0.71
GO Biological Processes	GO:1903321	negative regulation of protein modification by small protein conjugation or removal	-2.4	9.3	4.7	-0.7
Reactome Gene Sets	R-HSA-1280218	Adaptive Immune System	-2.4	3.1	3.4	-0.69
GO Biological Processes	GO:0043279	response to alkaloid	-2.4	9.2	4.7	-0.69
Reactome Gene Sets	R-HSA-5620912	Anchoring of the basal body to the plasma membrane	-2.3	9.1	4.7	-0.68
KEGG Pathway	hsa05203	Viral carcinogenesis	-2.3	5.8	4	-0.62
Reactome Gene Sets	R-HSA-9645723	Diseases of programmed cell death	-2.3	8.6	4.5	-0.62
GO Biological Processes	GO:0043086	negative regulation of catalytic activity	-2.3	3	3.3	-0.62
GO Biological Processes	GO:0018130	heterocycle biosynthetic process	-2.3	3	3.3	-0.61
GO Biological Processes	GO:0033674	positive regulation of kinase activity	-2.3	3.8	3.5	-0.6
GO Biological Processes	GO:0071902	positive regulation of protein serine/threonine kinase activity	-2.3	5.7	4	-0.6
GO Biological Processes	GO:0042542	response to hydrogen peroxide	-2.3	8.4	4.4	-0.59
GO Biological Processes	GO:0019438	aromatic compound biosynthetic process	-2.2	3	3.3	-0.58
KEGG Pathway	hsa05207	Chemical carcinogenesis - receptor activation	-2.2	5.6	3.9	-0.57
GO Biological Processes	GO:0019827	stem cell population maintenance	-2.2	8.1	4.3	-0.55
GO Biological Processes	GO:0040029	regulation of gene expression, epigenetic	-2.2	7.7	4.2	-0.49
GO Biological Processes	GO:0034614	cellular response to reactive oxygen species	-2.1	7.6	4.2	-0.48
GO Biological Processes	GO:0042752	regulation of circadian rhythm	-2.1	7.6	4.2	-0.48
GO Biological Processes	GO:0001578	microtubule bundle formation	-2.1	7.5	4.1	-0.47
GO Biological Processes	GO:0006979	response to oxidative stress	-2.1	4.1	3.4	-0.44
GO Biological Processes	GO:0031400	negative regulation of protein modification process	-2.1	3.4	3.2	-0.42
GO Biological Processes	GO:0051053	negative regulation of DNA metabolic process	-2.1	7.2	4	-0.42
GO Biological Processes	GO:0002520	immune system development	-2.1	3	3.1	-0.42

## Sheet: Supplementary Table S7
Supplementary Table S7：Prognostic models constructed based on cuproptosis,genomic instability and senescence in previous literatures.
Type	model name	Number of genes	AUC for 1-year OS	Reference
cuproptosis	CRLPM	8	0.69	doi:10.3389/fgene.2022.947551
	CRMs	14	0.709	doi:10.1155/2022/4694323
	CuAGS-13	13	0.744	doi:10.3389/fimmu.2022.971142
	/	16	0.766	doi:10.1155/2022/5422698
	/	9	0.719	doi:10.3389/fgene.2022.982888
	/	11	0.751	doi:10.3389/fgene.2022.969845
	14-gene signature	14	0.7	doi:10.3389/fonc.2022.955336
	cuproptosis index	10	0.695	doi:10.3389/fimmu.2022.954653
genomic instability	GIGSig score	9	0.746	doi: 10.3389/fcell.2021.728574
	GIlncSig	13	0.735	doi: 10.1155/2022/3090523
	Somatic Mutation-Derived LncRNA Signature	7	0.713	doi: 10.3389/fsurg.2021.724792
	genomic instability-derived lncRNA signature	8	0.727	doi: 10.3389/fgene.2021.763281
	DDR-related gene signature	3	0.746	doi: 10.1155/2022/4869732
	GLncM	2	0.709	doi: 10.3389/fgene.2022.1034979
Senescence	aging-related risk signature	15	0.722	doi: 10.18632/aging.202589
	Cellular Senescence-Related Gene signature	11	0.666	doi: 10.3389/fgene.2022.909546
	ASIG risk score	4	0.736	doi: 10.3389/fimmu.2022.997765
	Prognostic Cell Senescence Index	4	0.642	doi: 10.3389/fimmu.2022.908068
TP53	TP53 mutation	1	0.61	The AUC were calculated from the TCGA database
